1 **In-depth immunophenotyping with mass cytometry during TB treatment**  
2 **reveals non-canonical T-cell subsets associated with sputum culture**  
3 **conversion.**

4  
5 **Authors:** Carole CHEDID<sup>1,2,3#</sup>, Thibault ANDRIEU<sup>4</sup>, Eka KOKHREIDZE<sup>5#</sup>, Nestani  
6 TUKVADZE<sup>5#</sup>, Samanta BISWAS<sup>6#</sup>, Md. Fahim ATHER<sup>6#</sup>, Mohammad Khaja Mafij  
7 UDDIN<sup>6#</sup>, Sayera BANU<sup>6#</sup>, Flavio DE MAIO<sup>7</sup>, Giovanni DELOGU<sup>7</sup>, Hubert ENDTZ<sup>8#</sup>, Delia  
8 GOLETTI<sup>9</sup>, Marc VOCANSON<sup>1</sup>, Oana DUMITRESCU<sup>1,10,11</sup>, Jonathan HOFFMANN<sup>1,2\*#</sup>,  
9 Florence ADER<sup>1,12\*</sup>.

10  
11 **Affiliations:**

- 12 1. Centre International de Recherche en Infectiologie, Legionella Pathogenesis Group,  
13 INSERM U1111, Université Claude Bernard Lyon 1, CNRS UMR5308, École Normale  
14 Supérieure de Lyon, Lyon, France
- 15 2. Medical and Scientific Department, Fondation Mérieux, Lyon, France
- 16 3. Département de Biologie, Ecole Normale Supérieure de Lyon, Lyon, France
- 17 4. Cytometry Core Facility, Centre de Recherche en Cancérologie de Lyon, Université  
18 Claude Bernard Lyon 1, Inserm 1052, CNRS 5286, Centre Léon Bérard, 69373, Lyon, France
- 19 5. National Center for Tuberculosis and Lung Diseases (NCTBLD), Tbilisi, Georgia
- 20 6. Infectious Diseases Division, International Centre for Diarrhoeal Disease Research,  
21 Bangladesh (icddr,b), Dhaka, Bangladesh
- 22 7. Dipartimento di Scienze biotecnologiche di base, cliniche intensivologiche e  
23 perioperatorie – Sezione di Microbiologia, Università Cattolica del Sacro Cuore, Rome, Italy
- 24 8. Fondation Mérieux, Lyon, France

25 9. Translational Research Unit, Department of Epidemiology and Preclinical Research, “L.  
26 Spallanzani” National Institute for Infectious Diseases (INMI), IRCCS, Rome, Italy

27 10. Hospices Civils de Lyon, Institut des Agents Infectieux, Laboratoire de Bactériologie,  
28 Lyon, France

29 11. Université Lyon 1, Facultés de Médecine et de Pharmacie de Lyon, Lyon, France

30 12. Hospices Civils de Lyon, Hôpital de la Croix-Rousse, Département des Maladies  
31 Infectieuses et Tropicales, F-69004, Lyon, France.

32 \* These authors share the senior authorship.

33 #: On behalf of the HINTT working group within the GABRIEL network.

34

35 **Keywords:** tuberculosis; treatment monitoring; immunophenotyping; CD8<sup>+</sup> T-cells; heparin-  
36 binding hemagglutinin; inflammatory markers; mass cytometry; unsupervised data analysis.

37

38 **Corresponding author:**

39 Carole CHEDID

40 Centre International de Recherche en Infectiologie – INSERM U1111 – CNRS UMR5308

41 Département des Maladies Infectieuses et Tropicales

42 Hôpital de la Croix-Rousse, Hospices Civils de Lyon,

43 104, Grande Rue de la Croix-Rousse

44 69004 Lyon, FRANCE

45 [carole.chedid@fondation-merieux.org](mailto:carole.chedid@fondation-merieux.org)

46 +33 6 72 68 69 35

47

## 48 **Summary**

49 In patients treated for pulmonary TB, high-dimensional immune profiling with mass cytometry  
50 revealed that *Mycobacterium tuberculosis* culture conversion is associated with newly  
51 characterized peripheral CD8<sup>+</sup> T-cell phenotypes. This paves the way for new immune  
52 biomarkers associated with mycobacterial sterilization.

53

## 54 **Abstract**

55 Tuberculosis (TB) is a difficult-to-treat infection because of multidrug regimen requirements  
56 based on drug susceptibility profiles and treatment observance issues. TB cure is defined by  
57 mycobacterial sterilization, technically complex to systematically assess. We hypothesized that  
58 microbiological outcome was associated with stage-specific immune changes in peripheral  
59 whole blood during TB treatment. The T-cell phenotypes of treated TB patients were  
60 prospectively characterized in a blinded fashion using mass cytometry after *Mycobacterium*  
61 *tuberculosis* (*Mtb*) antigen stimulation, and then correlated to sputum culture status. At two  
62 months of treatment, cytotoxic and terminally differentiated CD8<sup>+</sup> T-cells were under-  
63 represented and naïve CD4<sup>+</sup> T-cells were over-represented in positive- *versus* negative-sputum  
64 culture patients, regardless of *Mtb* drug susceptibility. At treatment completion, an antigen-  
65 driven T-cell immune shift towards differentiated subpopulations was associated with TB cure.  
66 Overall, we identified specific T-cell profiles associated with slow sputum converters, which  
67 brings new insights in TB prognostic biomarker research designed for clinical application.

68

## 69 **Introduction**

70 Tuberculosis (TB) is a leading cause of death of infectious origin, responsible for 1.5 million  
71 deaths worldwide in 2020 (World Health Organization Geneva, 2020). TB treatment regimens  
72 have toxic side effects (World Health Organization Geneva, 2019) requiring monitoring  
73 throughout treatment to adapt it and assess effectiveness. Pulmonary TB treatment monitoring  
74 relies on *Mycobacterium tuberculosis* (*Mtb*) detection in sputum samples (World Health  
75 Organization Geneva, 2018), which can be difficult to collect in later stages of treatment  
76 (Singhania et al., 2018). Smear microscopy yields highly sample- and operator-dependent  
77 results and has poor sensitivity (Parrish and Carroll, 2011). Sputum culture is the gold standard,  
78 although slow and requiring biosafety laboratory environments (Horne et al., 2010).  
79 Simultaneously, one of the main stakes in improving TB management is shortening TB  
80 treatment (Lienhardt et al., 2016). Overall, there is a need for novel non-sputum-based tools to  
81 monitor disease resolution and assess cure while remaining feasible in primary care settings  
82 (Goletti et al., 2018). Blood-based host immune biomarkers have recently gained interest in TB  
83 research as immune cells undergo phenotypic changes throughout the disease. Numerous past  
84 investigations have pointed to variations in the abundance and marker expression of several  
85 targeted subpopulations (Ahmed et al., 2018b; Adekambi et al., 2015a; Goletti et al., 2006b;  
86 Agrawal et al., 2018), in particular T-cells, which are pivotal effectors for *Mtb* clearance (Riou  
87 et al., 2020). However, this has been explored mostly in low-TB prevalence settings or with  
88 conventional flow cytometry, targeting a limited number of cell markers (Chiacchio et al., 2017;  
89 Musvosvi et al., 2018).

90 High-dimensional single-cell technologies such as mass cytometry enable the detection and  
91 quantification of a high number of cell markers (Gosse et al., 2018). This technique bypasses  
92 the limitations of spectral overlap by using monoclonal antibodies coupled to metal polymers,  
93 and has allowed high-dimensional exploration of the immune landscape in several domains

94 (Kourelis et al., 2019; Rubin et al., 2019). It has been applied to immune profiling during TB  
95 treatment in a 2018 study by Roy Chowdhury and colleagues (Roy Chowdhury et al., 2018), in  
96 which the authors have provided a general overview of changes in the main immune blood cells  
97 during treatment.

98 Here, in a prospective, international cohort study of adult patients treated for pulmonary TB in  
99 high prevalence countries, peripheral blood T-cell immune-profiles were characterized using a  
100 29-marker mass cytometry panel. In-depth T-cell phenotypical analysis was performed upon  
101 TB treatment initiation, after two months and at completion of treatment. To examine the  
102 relation between mycobacterial clearance in hosts and changes in T-cell immune-profiles, the  
103 results of these analysis were compared in negative and positive sputum culture conversion  
104 patients after two months of treatment.

105

## 106 **Results**

### 107 **Study design and analysis strategy**

108 Between May 2019 and July 2020, 144 cell samples collected from 22 adult TB patients were  
109 analyzed (Bangladesh, n=4 and Georgia, n=18; DS- and DR-TB, n=11 each) (Supp. Figure 1).  
110 Patient demographic, microbiological and clinical characteristics are available in Supp. Table 1.  
111 All patients achieved microbiological cure at the end of treatment, but were retrospectively  
112 classified into two response groups according to their *M. tuberculosis* culture status at T1 (after  
113 two months of treatment): fast converters (n=18; negative culture at T1 and T2) and slow  
114 converters (n=4; positive culture at T1 and negative culture at T2). Among the latter, three  
115 patients were treated for DS-TB and one for DR-TB.

116 An overview of the data collection and analysis process is shown in Figure 1. Briefly, data from  
117 all samples were clustered automatically into subsets of homogeneous phenotypes to provide a  
118 framework for analysis. Clusters were then color-coded and plotted onto a two-dimension map

119 to create a visual reference used throughout the paper (Figure 2). On this basis, automatically  
120 detected clusters were first quantified and analyzed dynamically throughout treatment to  
121 identify median clusters abundance variations associated with treatment completion (Figure 3).  
122 Cluster phenotypes were deduced from marker expression heatmaps, and hierarchical clustering  
123 was applied based on marker expression (Figure 4). In a supervised manner, clusters of similar  
124 abundance changes and immunophenotypes were then re-grouped into larger subsets, in order  
125 to assess relevance of the detected abundance variations at the individual level, and consistency  
126 with manual gating (Figure 5). Finally, a cross sectional analysis was performed at T1 to  
127 identify which automatically detected clusters differentiated patients based on the  
128 microbiological response to the intensive phase of treatment (*Mtb* culture positivity at T1;  
129 Figures 6 and 7).

130

131 **Overall analysis of peripheral T lymphocyte subset abundance changes throughout TB**  
132 **treatment.**

133 First, a phenotype analysis was performed to identify the main expected T-cell subpopulations.  
134 As no apparent difference was seen in UMAP structures within samples from the different  
135 timepoints and stimulation conditions despite some marker expression differences between  
136 stimulation conditions (Supp. Figure 2; exact p-values and test statistics in Supp. Table 2), we  
137 performed the phenotype analysis on all single CD3<sup>+</sup> events. The purpose of this study was not  
138 to compare the stimulations, but rather to use them to uncover clusters that might be associated  
139 with treatment response and that would not be visible in unstimulated samples. FlowSOM  
140 automated clustering was performed on CD3<sup>+</sup> events, revealing a total of 196 automatically  
141 detected clusters (Figure 2.A to 2.C). They were automatically grouped into 18 meta-clusters,  
142 which were assembled into 12 canonical T-cell subpopulations in a supervised manner (Figure

143 2.D and 2.E). FlowSOM clusters and meta-clusters were then visualized on the initial UMAP  
144 to create a reference map of all automatically detected T-cell subsets (Figure 2.F and 2.G).  
145 To initiate the abundance analysis, variations of the main T-cell subpopulations throughout  
146 treatment were then studied using a stratification according to each stimulation condition. No  
147 significant change in the proportion of total CD4<sup>+</sup>, CD8<sup>+</sup>,  $\gamma\delta$ , double negative (DN, CD4<sup>-</sup> CD8<sup>-</sup>  
148 ) or double positive (DP, CD4<sup>+</sup> CD8<sup>+</sup>) T-cells was observed throughout treatment in any  
149 stimulation condition (Supp. Figure 3). For all main studied subpopulations, no significant  
150 difference was observed between DS- and DR-TB patients (data not shown).

151

### 152 **Differential abundance of non-canonical T-cell subsets throughout TB treatment.**

153 To identify non-canonical T-cell subsets whose abundance changed throughout treatment, we  
154 calculated the percentage of each automatically determined FlowSOM cluster at each timepoint  
155 and in each stimulation condition. These clusters were then categorized into two groups:  
156 enriched or decreased after treatment completion. Abundance changes were studied between  
157 T0 and T1 and T0 and T2 to characterize the main clusters associated with response to treatment  
158 intensive phase and with treatment completion respectively. As these clusters represent non-  
159 canonical cell subpopulations, their frequencies among total CD3<sup>+</sup> events were low (< 5% in  
160 most samples). Hence, the differences analyzed thereafter describe rare populations and warrant  
161 cautious analysis.

162 When comparing the reference UMAP (Figure 2.G) to the UMAP of clusters which were  
163 increased between T0 and T1 (Supp. Figure 4.A), we observed that they were either DN T-  
164 cells, or effector memory (EM) or terminally differentiated effectors re-expressing CD45RA  
165 (TEMRA) cells from both CD4<sup>+</sup> and CD8<sup>+</sup> subpopulations. In unstimulated samples, significant  
166 increases were detected within three clusters corresponding to CD8<sup>+</sup> and DN T-cell subsets  
167 (Supp. Figure 4.B), whereas increases were detected in one CD4<sup>+</sup> and one CD8<sup>+</sup> cluster in TB2-

168 stimulated samples (Supp. Figure 4.C) and only in CD4<sup>+</sup> clusters in rmsHBHA samples (Supp.  
169 Figure 4.D). Clusters that decreased between T0 and T1 (Supp. Figure 4.E) were detected only  
170 within CD8<sup>+</sup> EM and TEMRA cells in all stimulation conditions (Supp. Figure 4.F to 4.H).  
171 Between T0 and T2, 11 increased clusters were detected (Figure 3.A). They corresponded  
172 mostly (8/11 clusters, 73%) to CD4<sup>+</sup> EM and CM subpopulations rather than naïve subsets,  
173 regardless of the stimulation condition (Figure 3.B. to 3.D.). One DN cluster was increased in  
174 unstimulated samples (Figure 3.B. as well as one CD8<sup>+</sup> TEMRA cluster and one  $\gamma\delta$  T-cell  
175 cluster in rmsHBHA stimulated samples (Figure 3.D.). One CD4<sup>+</sup> CM cluster (number 38)  
176 increased significantly in samples from all three stimulation conditions. Clusters which  
177 decreased between T0 and T2 were detected in one CD8<sup>+</sup> EM and two CD8<sup>+</sup> TEMRA subsets,  
178 and in seven clusters within CD4<sup>+</sup> subpopulations in all three stimulation conditions (Figure  
179 3.E to 3.H). Regarding the latter clusters, no clear trend was observed regarding memory subset  
180 compartmentalization, which suggests that the abundance decrease spared memory functions  
181 and rather affected CD4<sup>+</sup> T-cells in general. One  $\gamma\delta$  and one DN T-cell cluster also decreased  
182 significantly within *Mtb*-stimulated samples (Figure 3.G. and 3.H.).

183

184 **Antigen-driven cluster abundance changes during TB treatment show involvement of**  
185 **effector and memory T-cells.**

186 To further refine patterns in functional marker expressions within increased or decreased  
187 clusters, we then performed a detailed phenotype analysis using marker expression heatmaps  
188 and hierarchical clustering (Figure 4). Four subgroups of cellular subsets of similar abundance  
189 changes and similar immunophenotypes were identified (labeled from A to D). Subgroup A  
190 included four CD4<sup>+</sup> T-cell clusters with naïve (n=2) and CM (n=2) phenotypes, which  
191 decreased from T0 to T2 in rmsHBHA-stimulated samples. Subgroup B included five CD8<sup>+</sup> T-  
192 cell clusters that decreased throughout treatment, two of them between T0 and T1 and three of



193 them between T0 and T2. Consistently with the above results (Figure 3.E.), the latter were either  
194 EM or TEMRA cells, with low CD45RA levels and intermediate levels of perforin. The other  
195 two clusters were naïve clusters with low CCR7, CD45RA, and CD27 expression levels.

196

197 In contrast, subgroup C and D included only CD4<sup>+</sup> T-cell clusters, most of which (70%, 7/10)  
198 increased between T0 and T2. Subgroup C consisted in five clusters exhibiting a CM phenotype  
199 and expressing activation markers, detected in unstimulated and TB2-stimulated samples.  
200 Subgroup D clusters were detected in *Mtb*-stimulated samples (3 in rmsHBHA and 2 in TB2)  
201 and had an EM phenotype, except for cluster 69 that had a CM phenotype with low levels of  
202 CCR7. These clusters co-expressed CD26, IL7Ra, CD7 and CD27. They were characterized by  
203 an absence of activation marker expression and an enhanced expression of exhaustion markers,  
204 in particular CTLA-4 and PD-1. Overall, we observed antigen-driven T-cell subset abundance  
205 changes between T0 and T2. In TB2 and rmsHBHA samples, CD4<sup>+</sup> EM clusters mostly  
206 increased, while CD8<sup>+</sup> EM clusters mostly decreased.

207

208 **Individual profiling confirms abundance changes in phenotypically homogeneous,**  
209 **correlated subsets after treatment in cured patients.**

210 As the differentially abundant clusters identified above accounted for a small fraction of CD3<sup>+</sup>  
211 T-cells (<1%), we intended to identify the largest possible subsets of phenotypically  
212 homogeneous cells within which a significant abundance change was detectable (Figure 5).  
213 Within the subgroups of similar immunophenotypes and abundance change identified in  
214 Figures 3 and 4, we performed correlation analyses at baseline and pooled the best correlated  
215 clusters together within the subgroups identified in Figure 4 (Figure 5.A and 5.D). We then  
216 visualized the individual abundance change of these pooled subsets before and after treatment  
217 completion in cured patients (Figure 5.B-C and 5.D-E). Within rmsHBHA samples, a decrease

218 in subgroup A and an increase in subgroup D were both detected in 93% (13/14) of cured  
219 participants (Table 1). Within unstimulated samples, a decrease in subgroup B and an increase  
220 in subgroup C were recorded in 81% (13/16) and 88% (14/16) of patients respectively. This  
221 confirmed that the median trends observed previously were maintained individually in most  
222 patients. Finally, we visualized the immunophenotypes of these four subgroups of interest in  
223 comparison to cells from similar subpopulations which were not associated to cure (Figure 5.F).  
224 Subgroup A and subgroup C corresponded to CD4<sup>+</sup> CM cells expressing CCR6, IL7Ra, CD27,  
225 and activation markers (CD40L, CD38). However, cells within subgroup A expressed HLA-  
226 DR while subgroup C did not; in addition, cells from subgroup C expressed high levels of  
227 CD26, as well as CCR4, CXCR3, and CD7. Subgroup B corresponded to CD8<sup>+</sup> CD7<sup>+</sup> Perforin<sup>+</sup>  
228 EM cells. Subgroup D corresponded CD4<sup>+</sup> EM cells expressing high levels of CD26, as well as  
229 CCR4, CCR6, CXCR3, IL7Ra, CD7, and CD27. We then confirmed these findings by manually  
230 gating the identified subpopulations and comparing the percentages at T0 and T2 (Figure 5.G-  
231 K, representative dot plots).

232

233 **Patients with persistent positive cultures at T1 show decreased peripheral CD8<sup>+</sup> cytotoxic**  
234 **subsets and enriched peripheral CD4<sup>+</sup> naïve subsets throughout treatment compared to**  
235 **patients with negative cultures at T1.**

236 Then, we aimed to detect a cellular signature associated with mycobacterial conversion. To do  
237 so, we analyzed individual cluster abundance in slow *vs.* fast converters throughout treatment.  
238 At T0, T1, and T2, respectively 21, 24, and 21 clusters with significantly different abundance  
239 in slow converters compared to fast converters were detected (quantification in Supp. Fig. 5).  
240 After phenotyping, the proportions of the main T-cell subpopulation phenotypes in each group  
241 of enriched or decreased clusters at T0, T1, and T2 were calculated and summarized in Table 2.

242 Before treatment initiation, of 21 clusters with different abundance, 18 (86%) were decreased  
243 (Supp. Figure 5.A) and three (14%) were enriched (Supp. Figure 5.B) in slow compared to fast  
244 converters. Clusters which were under-represented in slow converters corresponded mostly to  
245 DN,  $\gamma\delta$ , and CD8<sup>+</sup> T-cells (77%, 13/18 clusters), specifically  $\gamma\delta$  and CD8<sup>+</sup> EM T-cell  
246 subpopulations (38%, 5/13 each); in addition, a majority of these clusters was perforin<sup>+</sup> (67%,  
247 12/18) (Supp. Figure 6.A). In contrast, the three enriched clusters were naive CD4<sup>+</sup> and CD8<sup>+</sup> T-  
248 cells, as well as one CD8<sup>+</sup> TEMRA subset.

249 At T1, of 24 clusters with significantly different abundance between slow and fast converters,  
250 15 (62%) were decreased (Figure 6.A and 6.C) and 9 (38%) were enriched in slow converters  
251 (Figure 6.B and 6.D). These clusters were mostly detected in TB2-stimulated samples (63%;  
252 15/24 clusters). Comparison to the reference UMAP (Figure 6.E) and hierarchical clustering  
253 (Figure 6.F) indicated that enriched and decreased subsets respectively had similar  
254 immunophenotypes. Clusters which were under-represented at T1 in slow converters were  
255 mostly perforin<sup>+</sup> cells (67%, 10/15 clusters); mostly CD8<sup>+</sup> TEMRA and DN T-cell phenotypes  
256 were represented (40%, 6/15 clusters respectively). In contrast, enriched clusters comprised a  
257 majority of CD4<sup>+</sup> T-cells (78%, 7/9 clusters), with predominantly naïve phenotypes (45%, 3/7).  
258 One CD8<sup>+</sup> naive and one CD8<sup>+</sup> EM cluster were also enriched in slow converters at T1, with  
259 the latter expressing ICOS.

260 After treatment completion, of 21 clusters with significantly different abundance between slow  
261 and fast converters, 11 (52%) were decreased (Supp. Figure 5.C) and 10 (48%) were enriched  
262 in slow converters (Supp. Figure 5.D). The immunophenotype profile at T2 was similar to that  
263 of T1 for the enriched subsets: a majority of ICOS<sup>+</sup> CD4<sup>+</sup> naïve T-cell subsets (50%, 5/10) were  
264 detected, as well as two CD8<sup>+</sup> naïve clusters (Supp. Figure 6.B). Regarding the decreased  
265 subsets, no specific phenotype polarization was observed, and clusters were detected within  
266 diverse subsets (four CD8<sup>+</sup> EM clusters, four CD4<sup>+</sup> EM clusters, and three DN T-cells clusters).

267 Similarly to the T1 immune profile, all of the above clusters were mostly detected in TB2-  
268 stimulated samples (67%, 14/21 clusters).

269

270 **Maturation markers and chemokine receptors, rather than activation or cytotoxic**  
271 **markers, discriminate slow from fast converters during treatment.**

272 Finally, we sought to assess more precisely which combinations of cellular markers were the  
273 most involved in the discrimination between fast and slow converters within the clusters  
274 identified in the prior section. A principal component analysis (PCA) was performed on marker  
275 expression data within these clusters. As a higher number of differentially abundant clusters  
276 had been detected in *Mtb*-stimulated samples than in unstimulated samples during treatment  
277 (T1 and T2), and because a complete overlap between the PCA profiles of fast and slow  
278 converters was observed in unstimulated samples, we focused on *Mtb*-stimulated samples (TB2  
279 and rmsHBHA). PCA profiles were mostly separated when split by culture conversion group  
280 (Figure 7.a). Dimension 1 (Dim1) explained 37.3% of the total observed variance, versus 12.5%  
281 for Dim2. The main markers accounting for variance described by Dim1 were markers of  
282 memory subset definition (CCR7 and CD45RA), lineage (CD4 and TCR $\gamma\delta$ ), maturation (CD27  
283 and CD7), chemokine receptors (CCR4 and to a lesser extent CXCR3) or other receptors or  
284 costimulatory molecules (*e.g.*, CD26, CD161) (Figure 7.B. and 7.C). In contrast, variance  
285 described by Dim2 was mostly explained by cytotoxicity (Perforin, CD56, CD8), activation  
286 (CD38, CD40L, CD69), or exhaustion markers (CD152, PD-1) (Figure 7.B and 7.D). The PCA  
287 scores were significantly higher in slow converters than in fast converters at all timepoints for  
288 Dim1 (Figure 7.E), indicating that the immune profile of slow converters was more correlated  
289 to Dim1 than that of fast converters regardless of the timepoint. In contrast, no significant  
290 differences were detected at the end of treatment (T2) for Dim2 (Figure 7.F). When comparing  
291 these results with PCA analyses performed on total CD3<sup>+</sup> T-cells, fast and slow converter

292 profiles were less separated, but similar marker involvement was observed in Dim1 and Dim2  
293 respectively (Supp. Figure 7).

## 294 Discussion

295 In a population of adults treated for TB, we observed a shift towards more differentiated profiles  
296 among peripheral CD8<sup>+</sup> and CD4<sup>+</sup> T-cell subsets driven by the timing of *Mtb* culture  
297 conversion, using a high-dimensional single cell approach after stimulation with standardized,  
298 IVD-level TB2 antigens. In particular, differentiated CD8<sup>+</sup> cytotoxic effector subsets were  
299 under-represented in positive- versus negative-sputum culture patients after two months of  
300 treatment.

301 Over the course of TB treatment, we observed as a general trend that non-canonical subsets  
302 within CM CD4<sup>+</sup> and TEMRA CD8<sup>+</sup> populations increased, whereas naïve CD4<sup>+</sup> and naïve/EM  
303 CD8<sup>+</sup> subsets decreased. This is consistent with prior works addressing T-cell differentiation  
304 and T-cell memory subsets during TB treatment (Marriott et al., 2018; Chiacchio et al., 2014;  
305 Wang et al., 2010). *Mtb*-specific CD4<sup>+</sup> EM T-cells have been associated with active TB disease,  
306 whereas CM T-cells have been associated to latency and increased upon treatment (Petruccioli  
307 et al., 2013; Goletti et al., 2006a). In *Mtb*-specific CD8<sup>+</sup> T-cells, an overall decrease in  
308 peripheral blood (Nyendak et al., 2013) and a decrease in CM cells (Axelsson-Robertson et al.,  
309 2015b) have been documented after treatment. In contrast, the central result of this study was  
310 to distinguish negative- from positive-sputum culture patients at two months, whether infected  
311 with a DS- or DR-*Mtb* strain, through differential peripheral T-cell populations. When  
312 retrospectively analyzing the T-cell profiles of fast and slow converters at diagnosis, a pre-  
313 existing difference in percentages of cytotoxic EM CD8<sup>+</sup> T-cell subpopulations was already  
314 observed. After two months of treatment, this trend shifted into an under-representation of  
315 CD8<sup>+</sup> TEMRA, which persisted after cure. These changes were revealed upon stimulation with  
316 QFT-P TB2 antigenic peptide pools. Although many studies characterizing T-cell subsets  
317 during treatment have clearly underlined the importance of *Mtb*-specific CD4<sup>+</sup> T-cells (Riou et  
318 al., 2014; Ahmed et al., 2018b; Riou et al., 2020), less is known about the role of CD8<sup>+</sup> T-cells

319 in TB resolution and the most appropriate epitopes to study them in this context (Lewinsohn et  
320 al., 2017; Chiacchio et al., 2018). Yet, effector CD8<sup>+</sup> T-cells are known to secrete cytolytic and  
321 antimicrobial factors that kill *Mtb*-infected macrophages *in vitro* (Serbina et al., 2000), inhibit  
322 *Mtb* growth (Lewinsohn et al., 2017), and are required for long-term infection control in mice  
323 (Lin and Flynn, 2015) and humans (Bruns et al., 2009); perforin production by CD8<sup>+</sup> T-cells is  
324 also higher in treated than in untreated TB patients (Jiang et al., 2017). In addition, a 2012 study  
325 by Rozot and colleagues had associated *Mtb*-specific TEMRA CD8<sup>+</sup> T cells to LTBI and EM  
326 cells to active TB (Rozot et al., 2013). Here, although we cannot establish causality, a lower  
327 peripheral CD8<sup>+</sup> TEMRA subset abundance may be associated with slower mycobacterial  
328 culture conversion. In relation with abundance changes during treatment, our study hints that  
329 the CD8<sup>+</sup> T-cell phenotype shift occurring during TB treatment would be delayed in patients  
330 with slower microbiological conversion. Consistently, it has been shown that CD8<sup>+</sup> response  
331 importantly contributed to the control of other granulomatous infections such as *Brucella*  
332 (Durward et al., 2012). Regarding CD4<sup>+</sup> T-cells, naïve subsets were over-represented in slow  
333 converters, which suggests a delayed differentiation within the CD4<sup>+</sup> compartment as well.  
334 Previous work has shown that the IFN- $\gamma$ /IL-2/TNF- $\alpha$  functional profile of *Mtb*-specific CD4<sup>+</sup>  
335 T-cells, which is key in anti-TB immunity (Chiacchio et al., 2017), was correlated with their  
336 degree of differentiation (Riou et al., 2017). Taken together, these results support the hypothesis  
337 that CD4<sup>+</sup> and CD8<sup>+</sup> T-cell responses should be monitored together during TB treatment, as  
338 successful mycobacterial clearance involves CD8<sup>+</sup> T-cell effectors, which in turn require CD4<sup>+</sup>  
339 T-cell involvement (Grotzke and Lewinsohn, 2005).

340 Although the aim of this study was not to compare stimulation conditions, but to use them to  
341 uncover cell clusters, our results suggest that the abundance changes observed throughout  
342 treatment are antigen-driven. This adds to previous work highlighting differential *Mtb*-specific  
343 CD8<sup>+</sup> T-cells marker profiles according to the nature of the antigen stimulation (Axelsson-

344 Robertson et al., 2015a). We used QFT-P TB2, which elicits cytotoxic CD8<sup>+</sup> responses in  
345 addition to ESAT-6/CFP-10-induced CD4<sup>+</sup> responses (Petruccioli et al., 2016), as well as  
346 rmsHBHA, a recombinant *Mtb* protein exposing many different epitopes. The latter was  
347 included because the IFN- $\gamma$  response to HBHA, to which both CD4<sup>+</sup> and CD8<sup>+</sup> cells participate  
348 (Masungi et al., 2002), is impaired in active TB patients and restored during treatment (Chedid  
349 et al., 2021; Sali et al., 2018; De Maio et al., 2018). Here, changes during treatment in CD8<sup>+</sup>,  
350 CD4<sup>+</sup>, DN, and  $\gamma\delta$  T-cell subsets were detectable within unstimulated and TB2 samples,  
351 consistently with previous works (Petruccioli et al., 2016). In contrast, in rmsHBHA-stimulated  
352 samples, significant abundance changes were mostly detected within CD4<sup>+</sup> T-cells, suggesting  
353 a preferential CD4<sup>+</sup> T-cell response to HBHA epitopes during treatment. This indicates that  
354 antigen-driven changes during the response to *Mtb* are part of a complex process involving a  
355 variety of different epitopes (Axelsson-Robertson et al., 2015b) that induce responses from  
356 phenotypically diverse T-cell subsets (Axelsson-Robertson et al., 2015a), despite well-  
357 described immunodominance features. Our results confirm that a major stake in discovering  
358 blood-based immune signatures of mycobacterial sterilization lies in finding the appropriate  
359 epitopes.

360 Finally, our study enabled profiling of non-lineage markers. A CXCR3<sup>+</sup> CCR6<sup>+</sup> CD27<sup>+</sup> CD4<sup>+</sup>  
361 EM subset was increased in cured patients compared to pre-treatment, corresponding to a subset  
362 enriched in Th1/Th17 cells (Kim et al., 2001; Acosta-Rodriguez et al., 2007). Consistently with  
363 previous work on LTBI (Lindestam Arlehamn et al., 2013), this suggests that an increase in  
364 these cells upon cure might be associated with infection control. Compared to the other CD4<sup>+</sup>  
365 EM cells, this subset displayed higher CD26 and IL7Ra expression. CD26 participates in T-cell  
366 activation and proliferation (Klemann et al., 2016), and correlates with Th1-like responses  
367 (Ohnuma et al., 2008). In parallel, a significant decrease was also observed in a highly activated  
368 CCR6<sup>+</sup> IL7Ra<sup>+</sup> CD4<sup>+</sup> CM subset, which expressed higher levels of CD40L, CD38, and HLA-



369 DR than other CD4<sup>+</sup> CM cells. Interestingly, an increase in another CD4<sup>+</sup> CM subset – which  
370 differed from the latter because it expressed CD26 and CD27, but not HLA-DR – was observed  
371 simultaneously. This adds to previous works highlighting a decrease in CD38<sup>+</sup> and HLA-DR<sup>+</sup>  
372 *Mtb*-specific CD4<sup>+</sup> T-cells in successfully treated TB patients (Ahmed et al., 2018a; Riou et al.,  
373 2020; Adekambi et al., 2015b). This suggests that upon TB treatment, differentiated Th1/Th17-  
374 like CD4<sup>+</sup> subsets expressing high levels of CD26 and IL7Ra are enriched in peripheral blood,  
375 likely at the expense of less differentiated subsets expressing high levels of CD27 and CD38.  
376 Finally, principal components analysis showed that within the subpopulations that  
377 differentiated slow from fast converters during treatment, differentiation markers and  
378 chemokine receptors contributed to most of the variance, followed by activation and  
379 cytotoxicity markers. CD27, CD26, and CCR4 were among the markers which best  
380 discriminated fast and slow responders, consistently with prior studies associating CD27 and  
381 CCR4 expression in *Mtb*-specific CD4<sup>+</sup> T-cells with active TB compared to latent infection  
382 (Latorre et al., 2019). HLA-DR and CD38 also contributed to a lesser extent, which adds to a  
383 recent study in which co-expression of CD27, HLA-DR, and CD38 on PPD-stimulated CD4<sup>+</sup>  
384 T-cells stratified fast and slow responders without restriction to IFN- $\gamma$ -producing cells (Vickers  
385 et al., 2020).

386 This descriptive study has limitations. The number of patients included was low, resulting in  
387 few slow converters, consistently with treated TB course (15 to 20% of slow culture converters).  
388 In addition, the presence of within-host *Mtb* isolate micro-diversity has been recently proven in  
389 patients treated for DS-TB without culture conversion after two months of well-conducted TB  
390 treatment (Genestet et al., 2021), suggesting that it could modulate the host response. We are  
391 currently conducting a larger validation study including DS-TB patients only, from whom *Mtb*  
392 isolates collected upon treatment initiation and at two months will be screened by whole  
393 genome sequencing. In addition, the analyses were not conducted on live cells, but on fixed,

394 cryopreserved peripheral blood cells due to the design of the study using samples collected in  
395 lower-income, high TB prevalence settings. For the same reason, the study was conducted on  
396 peripheral blood, while the main infectious focus of TB is in the lungs. In addition, since the  
397 study required to IGRAs to be performed on the same blood samples prior to cell  
398 cryopreservation (Chedid et al., 2021), we did not perform intracellular cytokine staining.  
399 Hence, the integrality of the observed cell phenotype changes may not be associated with *Mtb*-  
400 specific responses. However, whether the bulk of anti-TB response relies purely on *Mtb*-  
401 specific cells is debated. Given the complexity of the immune response to TB, cellular and  
402 molecular interactions are likely to occur between *Mtb*-specific and non-specific  
403 subpopulations during mycobacterial clearance, and hence influence the overall T-cell profiles.  
404 In addition, the hypothesis that T-cells specific for immunodominant epitopes actually  
405 recognize *Mtb*-infected cells has been challenged by studies on mouse models (Patankar et al.,  
406 2020), protective immunity post-BCG vaccination(Kagina et al., 2010), and failures of vaccine  
407 candidates based on immunodominant antigens (Moguche et al., 2017).

408 These limitations are linked to the “bench to bedside” approach adopted in our study. They  
409 reflect the reality of the needs for novel TB management tools: accessible samples, simple  
410 experimental process, straightforward output. Here, we captured the complexity of T-cell  
411 profiles during treatment and narrowed it down to subpopulations of interest associated with  
412 cure at the individual level. Although mass cytometry requires complex equipment,  
413 experiments, and analyses, we have shown that relevant T-cell profiles could be identified in  
414 cryopreserved samples, obtained from small blood volumes, using manual gating analyses and  
415 a smaller number of core markers. Future validation studies might confirm the relevancy of  
416 simpler phenotypic signatures translatable in primary care settings. Importantly, our study  
417 revealed T-cell populations discriminating patient status based on culture conversion, which  
418 has a dual impact: on TB management, to better characterize the phenotypes of T-cells involved

419 in TB clearance; and on biomarker research, further supporting that a diversity of epitopes is  
420 needed to fully disclose the spectrum of these cells. This work may help identify simpler  
421 prognostic biomarkers associated with mycobacterial clearance and the antigens appropriate for  
422 their discovery.  
423

## 424 **Materials and methods**

### 425 **Experimental design**

#### 426 *Study design and research objectives*

427 This prospective cohort study was nested in a multicentered study coordinated by the Mérieux  
428 Foundation GABRIEL network (Chedid et al., 2020). The primary objective was to investigate  
429 the association between sputum culture sterilization during TB treatment and T-cell profiles  
430 obtained by high-dimensional phenotyping. The sample size was maximized based on  
431 availability of clinical samples. No prospective sample size calculations were performed.

#### 432 *Recruitment centers and ethical considerations*

433 Recruitment centers were the National Center for Tuberculosis and Lung Disease (NTCLD) in  
434 Tbilisi, Georgia (approval of the Institutional Review Board of the NTCLD; IORG0009467);  
435 and the International Centre for Diarrhoeal Disease Research, Bangladesh (icddr,b) in Dhaka,  
436 Bangladesh (approval of the Research Review Committee and the Ethical Review Committee  
437 of icddr,b; PR-17076; Version No. 1.3; Version date: 04-01-2018). All participants provided  
438 written informed consent.

#### 439 *Cohort recruitment, patient follow-up, and clinical data collection*

440 Patients were recruited if diagnosed with sputum culture confirmed pulmonary TB and older  
441 than 15 years old. Patients with HIV, immune deficiency, diabetes mellitus, and lost-to-follow-  
442 up were excluded. Detailed procedures for microbiological diagnosis, drug susceptibility  
443 testing, and treatment regimens are described elsewhere (Chedid et al., 2020). As antimicrobial  
444 resistance is a major challenge for TB management and treatment, both drug-susceptible (DS-  
445 TB) and drug-resistant (DR-TB) patients were recruited to examine immune profiles in these  
446 settings. Patients were followed up: at inclusion (T0), after two months of treatment (T1), and  
447 at the end of TB treatment (T2; 6 months for DS-TB patients, 9 to 24 months for DR-TB  
448 patients). The T1 timepoint was chosen because it marks the moment after which antibiotic

449 treatment is reduced during clinical DS-TB management. For DR-TB monitoring, the same  
450 timepoint was used for consistency. Patients were on Directly Observed Treatment (DOT) and  
451 received treatment according to standard protocols (World Health Organization Geneva, 2019).  
452 Treatment regimens are detailed in Supp. Table 1.

453

#### 454 **Whole blood stimulation and processing**

455 Detailed whole blood collection and stimulation processes were described elsewhere (Chedid  
456 et al., 2021). Briefly, at every follow-up visit, 1mL of whole blood was drawn from the  
457 antecubital area of the arm and seeded directly into each QuantiFERON-TB Gold Plus (QFT-  
458 P, Qiagen) tube and incubated for 24 hours. Three stimulation conditions were used: NIL as  
459 unstimulated control; TB2 which tubes contain the *M. tuberculosis* antigenic peptides ESAT-6  
460 (>15aa) and CFP-10 (8-13aa), which induce responses from CD4<sup>+</sup> T lymphocytes (Petruccioli  
461 et al., 2016), and an undisclosed peptide pool inducing CD8<sup>+</sup> T lymphocyte stimulation  
462 (Qiagen, 2017); rmsHBHA which tubes contain recombinant *M. tuberculosis* heparin-binding  
463 hemagglutinin generated in *M. smegmatis* at a final concentration of 5µg/mL and graciously  
464 provided by the Delogu laboratory, UNICATT, Rome, Italy (Delogu et al., 2011). After  
465 incubation, plasma separation, and red blood cell lysis with FACS lysing buffer (BD  
466 Biosciences) according to the manufacturer's instructions, the resulting fixed white blood cells  
467 pellets were stored at -80°C. Cryopreserved samples were air-shipped in dry ice with freezing  
468 controls to the Mérieux Foundation Emerging Pathogens Laboratory in Lyon, France  
469 (International Center for Infectiology Research, INSERM U1111).

470

## 471 **Experimental procedure for mass cytometry**

### 472 *Sample preparation*

473 Cryopreserved cells were thawed and resuspended in phosphate buffer saline (PBS) to a  
474 concentration of  $3.5 \times 10^6$  cells/mL. Between 1 and  $1.5 \times 10^6$  cells from each sample were  
475 aliquoted for staining. Cells were incubated 10 minutes with FcR Blocking Reagent ( $6 \mu\text{L}/10^6$   
476 cells; Miltenyi Biotec) and heparin sodium salt reconstituted in Millipore water ( $36 \mu\text{g}/10^6$  cells;  
477 Sigma-Aldrich) to reduce nonspecific staining (Rahman et al., 2016).

### 478 *Panel design*

479 A 29-marker panel of metal-labeled antibodies was used. All antibodies were obtained from  
480 Fluidigm (Supp. Table 8). Briefly, the panel contained 28 T-cell oriented surface markers  
481 (lineage markers, chemokine receptors, activation markers, and exhaustion markers) and one  
482 intracellular target (perforin).

### 483 *Experimental design and barcoding*

484 As the study followed a longitudinal design, samples from a same patient were acquired in the  
485 same barcoded batch of 3 timepoints and 3 stimulation conditions to reduce experimental  
486 variation. Palladium barcoding (Mei et al., 2015) (Cell-ID 20-Plex, Fluidigm) was performed  
487 according to the manufacturer's instructions for simultaneous staining and data acquisition. For  
488 each barcoding run, 18 patient T-cell samples were stained with unique combinations of  
489 intracellular palladium isotopes (Figure 1). Patient batches were processed in a random order  
490 and investigators were blinded to patient sputum culture results during data collection.

### 491 *Staining procedure*

492 Extracellular staining was performed on pooled barcoded cells in Maxpar cell staining buffer  
493 (Fluidigm) for 30 minutes at room temperature. Intracellular staining (perforin) was performed  
494 in Maxpar Perm-S Buffer (Fluidigm) for 30 minutes at room temperature. Stained cells were  
495 then incubated for 10 minutes in 1.6% formaldehyde (FA) freshly prepared from 16% stock FA

496 (Sigma-Aldrich). DNA staining was performed by overnight incubation at 4°C in 2mL of  
497 125nM Cell-ID Iridium intercalator solution (Fluidigm). Cells were then washed, pelleted, and  
498 kept at 4°C until acquisition.

#### 499 *Data acquisition*

500 Samples were analyzed on a CyTOF2 mass cytometer upgraded to Helios (Fluidigm) hosted by  
501 the AniRA cytometry facility (Structure Fédérative de Recherche Lyon Gerland, INSERM  
502 U1111, Lyon, France). Samples were filtered twice through a 50µm nylon mesh and  
503 resuspended in EQ™ Four Element Calibration Beads (Fluidigm) diluted to 0.5X in Maxpar  
504 ultra-pure water (Fluidigm), to reach an acquisition rate of 150-200 events per second (0.5 x  
505 10<sup>6</sup> cells/mL). Data were collected using the on-board Fluidigm software.

506

#### 507 **Data analysis**

508 All data analyses were performed in RStudio (version 1.3.1073 with R version 4.0.3) and  
509 FlowJo (version 10.7.1).

#### 510 *Data cleaning and preliminary manual gating*

511 Signal normalization, concatenation, debarcoding, and conversion into Flow Cytometry  
512 Standard (FCS) 3.0 format were performed using the Helios Software (Fluidigm). Debarcoded  
513 files were imported into FlowJo and arcsinh-transformed (cofactor = 5). Gaussian parameters  
514 of the Helios system were used for doublet exclusion (Leipold et al., 2015), then <sup>191</sup>Ir<sup>+</sup> <sup>193</sup>Ir<sup>+</sup>  
515 single events were manually isolated, and debris (CD45<sup>-</sup> events) and calibration beads (<sup>140</sup>Ce<sup>+</sup>  
516 events) were excluded). A preliminary manual gating analysis was then performed on CD45<sup>+</sup>  
517 single events (Supp. Figure 8) to verify that the proportions of the main white blood cell  
518 subpopulations in biobanked samples were consistent with the expected proportions, and  
519 sufficient for downstream analysis. Samples with less than 1,000 CD3<sup>+</sup> events, and batches with  
520 missing samples from a given timepoint were removed from the analysis to preserve a matched

521 sample design. The exact number of available files per patient and per stimulation condition is  
522 provided in Supp. Table 1.

### 523 *Workflow for unsupervised analyses*

524 CD3<sup>+</sup> single events were down-sampled to ensure equal contribution of each sample, exported  
525 into separate Comma Separated Value (.csv) files, and uploaded into R software (version 4.0.3).  
526 Panel markers were defined as either lineage or functional markers for use as clustering  
527 channels in downstream analyses (Supp. Table 9). Lineage-defining markers included  
528 canonical surface markers such as CD4 which display a theoretically stable expression.  
529 Functional markers included markers of activation (*e.g.* CD69), proliferation (CD38),  
530 maturation (CD27), or migration (CCR7).

### 531 *Dimension reduction, automated clustering, and phenotyping*

532 After file concatenation, dimension reduction was performed with UMAP (Uniform Manifold  
533 Approximation and Projection; version 3.1) (Becht et al., 2019). UMAPs were created in R  
534 using the package Spectre (Ashhurst et al., 2020). Unsupervised clustering was performed using  
535 FlowSOM (Van Gassen et al., 2015) (version 2.7). FlowSOM meta-cluster phenotyping was  
536 assessed by visualizing the surface expression of lineage markers in each FlowSOM cluster  
537 (CD4, CD8, TCRgd, TCRVa7.2, CD56, CD25, IL7Ra, CD26, and CD161) on a heatmap and  
538 performing hierarchical clustering. Marker expression heatmaps were obtained in R using  
539 Spectre by plotting normalized, median arcsinh-transformed mass signals. Biological  
540 consistency of FlowSOM meta-clusters with the main expected T-cell subpopulations (Supp.  
541 Table 3) was controlled, and manual reassignment of clusters which were in inconsistent meta-  
542 clusters was then performed when necessary (Supp. Figure 9). Meta-clusters with an abundance  
543 <1% of all events were pooled with the most phenotypically similar meta-cluster. Then, the  
544 proportion of corrected FlowSOM meta-clusters in each node on the initial FlowSOM minimum  
545 spanning tree was visualized to control reassignment consistency (Quintelier et al., 2021).



546 *Statistical analysis*

547 The proportion (percent of CD3<sup>+</sup>) of each FlowSOM cluster was calculated. For all statistical  
548 analyses, exact p-values, test statistics and/or estimates of effect size are provided either in the  
549 figure legend or in indicated Supplementary Tables. Normality was assessed using the Shapiro-  
550 Wilk test. The evolution of cluster proportions over time corresponded to repeated measures of  
551 non-normal, non-independent continuous variables, and was analyzed in matched samples  
552 using the two-sided Friedman rank sum test with the Wilcoxon–Nemenyi–McDonald-  
553 Thompson post-hoc test (Pereira et al., 2015). Independent, non-normal continuous variables  
554 were analyzed with the two-sided Mann–Whitney U test or the Kruskal–Wallis test with Dunn’s  
555 Kruskal–Wallis Multiple Comparisons *post-hoc* test (Dunn, 1964) when more than two  
556 categories were compared. For discovery of clusters with significantly different abundance  
557 between slow and fast converters, conservative corrections for multiple comparisons (*e.g.*  
558 Benjamini-Hochberg (Yoav Benjamini and Yosef Hochberg, 1995)) were not used in order to  
559 minimize type II errors. Instead, all p-values were computed for each timepoint, and the p-value  
560 corresponding to the null hypothesis being rejected in 5% of all comparisons was used as the  
561 significance threshold instead of 0.05 (Althouse, 2016). This novel significance threshold  
562 enabled to control type I error while maintaining an exploratory approach; its value was always  
563 inferior to 0.05 and is reported in the corresponding figure captions.

564

565 **Supplemental Materials**

566 Supp. Figure 1 is a flowchart of patient inclusions. Supp. Figure. 2 shows the impact of *in vitro*  
567 *Mtb* antigen whole blood stimulation on surface marker expression in the main T-cell  
568 compartments. Supp. Figure. 3 summarizes the frequencies of the main peripheral T-cell  
569 subpopulations throughout anti-TB treatment. Supp. Figures 4 to 6 quantify and illustrate how  
570 patients with slow microbiological culture conversion show decreased CD8<sup>+</sup> and enriched

571 CD4<sup>+</sup> naïve peripheral T-cell subsets during treatment. Supp. Figure 7 reports PCA data  
572 characterizing the variance between fast and slow responders within all *Mtb*-stimulated CD3<sup>+</sup>  
573 T-cells. Supp. Figure 8 and 9 relate to the Methods section, and show the main CD45<sup>+</sup> non-  
574 granulocyte whole blood subpopulations, a T-cell oriented gating strategy, as well as the  
575 methods used to control automated FlowSOM metaclustering. Regarding tables, Supp. Table 1  
576 summarizes the sociodemographic and clinical characteristics of the cohort. Supp. Tables 2  
577 through 7 list the exact p-values and test statistics for all analyses presented throughout the main  
578 manuscript. Supp. Table 8 lists the mass cytometry panel components. Supp. Table 9 shows  
579 how clustering channels were defined in relation to expected cell subpopulations for dimension  
580 reduction and automated clustering of CD3<sup>+</sup> T-cells.

581

## 582 **Author contributions**

583 FA and JH are the principal investigators and initiated the project together with DG, NT, and  
584 SBa. Samples were collected by EK, NT, MU, and SBi. CC and TA designed and optimized  
585 the mass cytometry protocol. CC performed all experiments and analyses. CC and FA wrote  
586 the manuscript. All authors contributed to the article and approved the submitted version.

587

## 588 **Acknowledgements**

589 We would like to thank the patients participating in our study, as well as the healthcare staff  
590 and laboratory collaborators in each study site.

591

## 592 **Funding**

593 This work was supported by Fondation Mérieux, Fondation Christophe et Rodolphe Mérieux,  
594 and Fondation AnBer, and the grant ANR-18-CE17-0020. A minor part of the study was  
595 supported by the Italian Ministry of Health “Ricerca Corrente, Linea 4.”

596

597 **Competing Interests**

598 DG reports personal fees from Biomérieux (consulting), Qiagen (consulting, lectures), and  
599 Diasorin (lectures) outside the submitted work. The authors declare no other competing  
600 interests.

601

602 **Data availability**

603 The datasets generated and used in this study are available from the corresponding author  
604 upon reasonable request, excluding confidential patient information.

605

606

## 607 **References**

- 608 Acosta-Rodriguez, E. V., L. Rivino, J. Geginat, D. Jarrossay, M. Gattorno, A. Lanzavecchia,  
609 F. Sallusto, and G. Napolitani. 2007. Surface phenotype and antigenic specificity of  
610 human interleukin 17-producing T helper memory cells. *Nat. Immunol.* 8:639–646.  
611 doi:10.1038/ni1467.
- 612 Adekambi, T., C.C. Ibegbu, S. Cagle, A.S. Kalokhe, Y.F. Wang, Y. Hu, C.L. Day, S.M. Ray,  
613 and J. Rengarajan. 2015a. Biomarkers on patient T cells diagnose active tuberculosis and  
614 monitor treatment response (vol 125, pg 1827, 2015). *J. Clin. Invest.* 125:3723.  
615 doi:10.1172/jci83279.
- 616 Adekambi, T., C.C. Ibegbu, S. Cagle, A.S. Kalokhe, Y.F. Wang, Y. Hu, C.L. Day, S.M. Ray,  
617 and J. Rengarajan. 2015b. Biomarkers on patient T cells diagnose active tuberculosis and  
618 monitor treatment response. *J. Clin. Invest.* 125:1827–1838. doi:10.1172/jci77990.
- 619 Agrawal, S., O. Parkash, A.N. Palaniappan, A.K. Bhatia, S. Kumar, D.S. Chauhan, and M.  
620 Madhan Kumar. 2018. Efficacy of T regulatory cells, Th17 cells and the associated  
621 markers in monitoring tuberculosis treatment response. *Front. Immunol.* 9:1–16.  
622 doi:10.3389/fimmu.2018.00157.
- 623 Ahmed, M.I.M., N.E. Ntinginya, G. Kibiki, B.A. Mtafya, H. Semvua, S. Mpagama, C.  
624 Mtabho, E. Saathoff, K. Held, R. Loose, I. Kroidl, M. Chachage, U. von Both, A. Haule,  
625 A.M. Mekota, M.J. Boeree, S.H. Gillespie, M. Hoelscher, N. Heinrich, and C.  
626 Geldmacher. 2018a. Phenotypic Changes on Mycobacterium Tuberculosis-Specific CD4  
627 T Cells as Surrogate Markers for Tuberculosis Treatment Efficacy. *Front. Immunol.*  
628 9:2247. doi:10.3389/fimmu.2018.02247.
- 629 Ahmed, M.I.M., N.E. Ntinginya, G. Kibiki, B.A. Mtafya, H. Semvua, S. Mpagama, C.  
630 Mtabho, E. Saathoff, K. Held, R. Loose, I. Kroidl, M. Chachage, U. von Both, A. Haule,  
631 A.M. Mekota, M.J. Boeree, S.H. Gillespie, M. Hoelscher, N. Heinrich, C. Geldmacher,

- 632 and E. Pan African Consortium. 2018b. Phenotypic Changes on Mycobacterium  
633 Tuberculosis-Specific CD4 T Cells as Surrogate Markers for Tuberculosis Treatment  
634 Efficacy. *Front. Immunol.* 9:13. doi:10.3389/fimmu.2018.02247.
- 635 Althouse, A.D. 2016. Adjust for Multiple Comparisons? It's Not That Simple. *Ann. Thorac.*  
636 *Surg.* 101:1644–1645. doi:10.1016/j.athoracsur.2015.11.024.
- 637 Ashhurst, T.M., F. Marsh-Wakefield, G.H. Putri, A.G. Spiteri, D. Shinko, M.N. Read, A.L.  
638 Smith, and N.J.C. King. 2020. Integration, exploration, and analysis of high-dimensional  
639 single-cell cytometry data using Spectre. *bioRxiv*. doi:10.1101/2020.10.22.349563.
- 640 Axelsson-Robertson, R., J.H. Ju, H.Y. Kim, A. Zumla, and M. Maeurer. 2015a.  
641 Mycobacterium tuberculosis-specific and MHC class I-restricted CD8+ T-cells exhibit a  
642 stem cell precursor-like phenotype in patients with active pulmonary tuberculosis. *Int. J.*  
643 *Infect. Dis.* 32:13–22. doi:10.1016/j.ijid.2014.12.017.
- 644 Axelsson-Robertson, R., M. Rao, A.G. Loxton, G. Walzl, M. Bates, A. Zumla, and M.  
645 Maeurer. 2015b. Frequency of Mycobacterium tuberculosis-specific CD8+ T-cells in the  
646 course of anti-tuberculosis treatment. *Int. J. Infect. Dis.* 32:23–29.  
647 doi:10.1016/j.ijid.2015.01.017.
- 648 Becht, E., L. McInnes, J. Healy, C.A. Dutertre, I.W.H. Kwok, L.G. Ng, F. Ginhoux, and E.W.  
649 Newell. 2019. Dimensionality reduction for visualizing single-cell data using UMAP.  
650 *Nat. Biotechnol.* 37:38–47. doi:10.1038/nbt.4314.
- 651 Bruns, H., C. Meinken, P. Schauenberg, G. Härter, P. Kern, R.L. Modlin, C. Antoni, and S.  
652 Stenger. 2009. Anti-TNF immunotherapy reduces CD8+ T cell-mediated antimicrobial  
653 activity against Mycobacterium tuberculosis in humans. *JCI.* 119:1167–1177.  
654 doi:10.1172/JCI38482.ated.
- 655 Chedid, C., E. Kokhreidze, N. Tukvadze, S. Banu, M.K.M. Uddin, S. Biswas, G.  
656 Russomando, C.C.D. Acosta, R. Arenas, P.P. Ranaivomanana, C. Razafimahatratra, P.

- 657 Herindrainy, J. Rakotonirina, A.H. Raherinandrasana, N. Rakotosamimanana, M.  
658 Hamze, M.B. Ismail, R. Bayaa, J.-L. Berland, F. De Maio, G. Delogu, H. Endtz, F. Ader,  
659 D. Goletti, and J. Hoffmann. 2021. Relevance of QuantiFERON-TB Gold Plus and  
660 Heparin-Binding Hemagglutinin Interferon- $\gamma$  Release Assays for Monitoring of  
661 Pulmonary Tuberculosis Clearance: A Multicentered Study. *Front. Immunol.* 11:1–11.  
662 doi:10.3389/fimmu.2020.616450.
- 663 Chedid, C., E. Kokhraidze, N. Tukvadze, S. Banu, M.K.M. Uddin, S. Biswas, G.  
664 Russomando, C.C.D. Acosta, R. Arenas, P.P. Ranaivomanana, C. Razafimahatratra, P.  
665 Herindrainy, N. Rakotosamimanana, M. Hamze, M.B. Ismail, R. Bayaa, J.-L. Berland,  
666 G. Delogu, H. Endtz, F. Ader, D. Goletti, and J. Hoffmann. 2020. Association of baseline  
667 white blood cell counts with tuberculosis treatment outcome: a prospective multicentered  
668 cohort study. *Int. J. Infect. Dis.* doi:10.1016/j.ijid.2020.09.017.
- 669 Chiacchio, T., G. Delogu, V. Vanini, G. Cuzzi, F. De Maio, C. Pinnetti, A. Sampaolesi, A.  
670 Antinori, and D. Goletti. 2017. Immune characterization of the HBHA-specific response  
671 in mycobacterium tuberculosis-infected patients with or without HIV infection. *PLoS*  
672 *One.* 12:1–18. doi:10.1371/journal.pone.0183846.
- 673 Chiacchio, T., E. Petruccioli, V. Vanini, G. Cuzzi, M.P. La Manna, V. Orlando, C. Pinnetti,  
674 A. Sampaolesi, A. Antinori, N. Caccamo, and D. Goletti. 2018. Impact of antiretroviral  
675 and tuberculosis therapies on CD4+ and CD8+ HIV/M. tuberculosis-specific T-cell in  
676 co-infected subjects. *Immunol. Lett.* 198:33–43. doi:10.1016/j.imlet.2018.04.001.
- 677 Chiacchio, T., E. Petruccioli, V. Vanini, G. Cuzzi, C. Pinnetti, A. Sampaolesi, A. Antinori, E.  
678 Girardi, and D. Goletti. 2014. Polyfunctional T-cells and effector memory phenotype are  
679 associated with active TB in HIV-infected patients. *J. Infect.* 69:533–545.  
680 doi:10.1016/j.jinf.2014.06.009.
- 681 Delogu, G., T. Chiacchio, V. Vanini, O. Butera, G. Cuzzi, A. Bua, P. Molicotti, S. Zanetti,

- 682 F.N. Lauria, S. Grisetti, N. Magnavita, G. Fadda, E. Girardi, and D. Goletti. 2011.  
683 Methylated HBHA produced in *M. smegmatis* discriminates between active and non-  
684 active tuberculosis disease among RD1-responders. *PLoS One*. 6.  
685 doi:10.1371/journal.pone.0018315.
- 686 Dunn, O.J. 1964. Multiple Comparisons Using Rank Sums. *Technometrics*. 6:241–251.  
687 doi:10.1080/00401706.1965.10490253.
- 688 Durward, M., G. Radhakrishnan, J. Harms, C. Bareiss, D. Magnani, and G.A. Splitter. 2012.  
689 Active evasion of CTL mediated killing and low quality responding CD8+ T cells  
690 contribute to persistence of brucellosis. *PLoS One*. 7. doi:10.1371/journal.pone.0034925.
- 691 Van Gassen, S., B. Callebaut, M.J. Van Helden, B.N. Lambrecht, P. Demeester, T. Dhaene,  
692 and Y. Saeys. 2015. FlowSOM: Using self-organizing maps for visualization and  
693 interpretation of cytometry data. *Cytom. Part A*. 87:636–645. doi:10.1002/cyto.a.22625.
- 694 Genestet, C., E. Hodille, A. Barbry, J.-L. Berland, J. Hoffmann, E. Westeel, F. Bastian, M.  
695 Guichardant, S. Venner, G. Lina, C. Ginevra, F. Ader, S. Goutelle, and O. Dumitrescu.  
696 2021. Rifampicin exposure reveals within-host *Mycobacterium tuberculosis* diversity in  
697 patients with delayed culture conversion. *PLOS Pathog*. 17:e1009643.  
698 doi:10.1371/journal.ppat.1009643.
- 699 Goletti, D., O. Butera, F. Bizzoni, R. Casetti, E. Girardi, and F. Poccia. 2006a. Region of  
700 difference 1 antigen-specific CD4+ memory T cells correlate with a favorable outcome  
701 of tuberculosis. *J. Infect. Dis*. 194:984–992. doi:10.1086/507427.
- 702 Goletti, D., O. Butera, F. Bizzoni, R. Casetti, E. Girardi, and F. Poccia. 2006b. Region of  
703 Difference 1 Antigen-Specific CD4 + Memory T Cells Correlate with a Favorable  
704 Outcome of Tuberculosis. *J. Infect. Dis*. 194:984–992. doi:10.1086/507427.
- 705 Goletti, D., C.S. Lindestam Arlehamn, T.J. Scriba, R. Anthony, D. Maria Cirillo, T. Alonzi,  
706 C.M. Denkinger, and F. Cobelens. 2018. Can we predict tuberculosis cure? Current tools

- 707 available. *Eur. Respir. J.* 1801089. doi:10.1183/13993003.01089-2018.
- 708 Gossez, M., T. Rimmelé, T. Andrieu, S. Debord, F. Bayle, C. Malcus, F. Poitevin-Later, and  
709 G. Monneret. 2018. Proof of concept study of mass cytometry in septic shock patients  
710 reveals novel immune alterations. *Sci. Rep.* 8:1–12. doi:10.1038/s41598-018-35932-0.
- 711 Grotzke, J.E., and D.M. Lewinsohn. 2005. Role of CD8+ T lymphocytes in control of  
712 *Mycobacterium tuberculosis* infection. *Microbes Infect.* 7:776–788.  
713 doi:10.1016/j.micinf.2005.03.001.
- 714 Horne, D.J., S.E. Royce, L. Gooze, M. Narita, P.C. Hopewell, P. Nahid, and K.R. Steingart.  
715 2010. Sputum monitoring during tuberculosis treatment for predicting outcome :  
716 systematic review and meta-analysis. *Lancet Infect. Dis.* 10:387–394.  
717 doi:10.1016/S1473-3099(10)70071-2.
- 718 Jiang, H.B., H.L. Gong, Q. Zhang, J. Gu, L. Liang, and J. Zhang. 2017. Decreased expression  
719 of perforin in CD8(+) T lymphocytes in patients with *Mycobacterium tuberculosis*  
720 infection and its potential value as a marker for efficacy of treatment. *J. Thorac. Dis.*  
721 9:1353–+. doi:10.21037/jtd.2017.05.74.
- 722 Kagina, B.M.N., B. Abel, T.J. Scriba, E.J. Hughes, A. Keyser, A. Soares, H. Gamielien, M.  
723 Sidibana, M. Hatherill, S. Gelderbloem, H. Mahomed, A. Hawkrige, G. Hussey, G.  
724 Kaplan, and W.A. Hanekom. 2010. Specific T cell frequency and cytokine expression  
725 profile do not correlate with protection against tuberculosis after bacillus Calmette-  
726 Guérin vaccination of newborns. *Am. J. Respir. Crit. Care Med.* 182:1073–1079.  
727 doi:10.1164/rccm.201003-0334OC.
- 728 Kim, C.H., L. Rott, E.J. Kunkel, M.C. Genovese, D.P. Andrew, L. Wu, and E.C. Butcher.  
729 2001. Rules of chemokine receptor association with T cell polarization in vivo. *J. Clin.*  
730 *Invest.* 108:1331–1339.
- 731 Klemann, C., L. Wagner, M. Stephan, and S. von Hörsten. 2016. Cut to the chase: a review of



- 732 CD26/dipeptidyl peptidase-4's (DPP4) entanglement in the immune system. *Clin. Exp.*  
733 *Immunol.* 185:1–21. doi:10.1111/cei.12781.
- 734 Kourelis, T. V, J.C. Villasboas, E. Jessen, S. Dasari, A. Dispenzieri, and D. Jevremovic. 2019.  
735 Mass cytometry dissects T cell heterogeneity in the immune tumor microenvironment of  
736 common dysproteinemias at diagnosis and after first line therapies. *Blood Cancer J.* 9.  
737 doi:10.1038/s41408-019-0234-4.
- 738 Latorre, I., M.A. Fernández-Sanmartín, B. Muriel-Moreno, R. Villar-Hernández, S. Vila,  
739 M.L. De Souza-Galvão, Z. Stojanovic, M.A. Jiménez-Fuentes, C. Centeno, J. Ruiz-  
740 Manzano, J.-P. Millet, I. Molina-Pinargote, Y.D. González-Díaz, A. Lacoma, L. Luque-  
741 Chacón, J. Sabriá, C. Prat, and J. Domínguez. 2019. Study of CD27 and CCR4 Markers  
742 on Specific CD4+ T-Cells as Immune Tools for Active and Latent Tuberculosis  
743 Management. *Front. Immunol.* 9:1–11. doi:10.3389/fimmu.2018.03094.
- 744 Leipold, M.D., E.W. Newell, and H.T. Maecker. 2015. Multiparameter Phenotyping of  
745 Human PBMCs Using Mass Cytometry. *Methods Mol Biol.* 1343:1–14.  
746 doi:10.1007/978-1-4939-2963-4.
- 747 Lewinsohn, D.A., G.M. Swarbrick, B. Park, M.E. Cansler, M.D. Null, K.G. Toren, J. Baseke,  
748 S. Zalwango, H. Mayanja-Kizza, L.L. Malone, M. Nyendak, G. Wu, K. Guinn, S.  
749 McWeeney, T. Mori, K.A. Chervenak, D.R. Sherman, W.H. Boom, and D.M.  
750 Lewinsohn. 2017. Comprehensive definition of human immunodominant CD8 antigens  
751 in tuberculosis. *npj Vaccines.* 2:1–10. doi:10.1038/s41541-017-0008-6.
- 752 Lienhardt, C., K. Lönnroth, D. Menzies, M. Balasegaram, J. Chakaya, F. Cobelens, J. Cohn,  
753 C.M. Denking, T.G. Evans, G. Källenius, G. Kaplan, A.M.V. Kumar, L. Matthiessen,  
754 C.S. Mgone, V. Mizrahi, Y. diul Mukadi, V.N. Nguyen, A. Nordström, C.F. Sizemore,  
755 M. Spigelman, S.B. Squire, S. Swaminathan, P.D. Van Helden, A. Zumla, K. Weyer, D.  
756 Weil, and M. Raviglione. 2016. Translational Research for Tuberculosis Elimination:

- 757           Priorities, Challenges, and Actions. *PLoS Med.* 13:1–11.  
758           doi:10.1371/journal.pmed.1001965.
- 759   Lin, P.L., and J.L. Flynn. 2015. CD8 T cells and Mycobacterium tuberculosis infection. *Semin*  
760           *Immunopathol.* 37:239–249. doi:10.1007/s00281-015-0490-8.
- 761   Lindestam Arlehamn, C.S., A. Gerasimova, F. Mele, R. Henderson, J. Swann, J.A.  
762           Greenbaum, Y. Kim, J. Sidney, E.A. James, R. Taplitz, D.M. McKinney, W.W. Kwok,  
763           H. Grey, F. Sallusto, B. Peters, and A. Sette. 2013. Memory T Cells in Latent  
764           Mycobacterium tuberculosis Infection Are Directed against Three Antigenic Islands and  
765           Largely Contained in a CXCR3+CCR6+ Th1 Subset. *PLoS Pathog.* 9.  
766           doi:10.1371/journal.ppat.1003130.
- 767   De Maio, F., F. Squeglia, D. Goletti, and G. Delogu. 2018. The Mycobacterial HBHA  
768           Protein: A Promising Biomarker for Tuberculosis. *Curr. Med. Chem.* 26:2051–2060.  
769           doi:10.2174/0929867325666181029165805.
- 770   Marriott, I., R. Stephens, C.J. Serrano, M.L. Gennaro, R. Arrigucci, K. Lakehal, P. Vir, D.  
771           Handler, A.L. Davidow, R. Herrera, J. Dolores Estrada-Guzmán, Y. Bushkin, S. Tyagi,  
772           and A.A. Lardizabal. 2018. Active Tuberculosis Is Characterized by Highly  
773           Differentiated Effector Memory Th1 Cells. *Front. Immunol.* 9:2127.  
774           doi:10.3389/fimmu.2018.02127.
- 775   Masungi, C., S. Temmerman, J.P. Van Vooren, A. Drowart, K. Pethe, F.D. Menozzi, C.  
776           Locht, and F. Mascart. 2002. Differential T and B cell responses against Mycobacterium  
777           tuberculosis heparin-binding hemagglutinin adhesin in infected healthy individuals and  
778           patients with tuberculosis. *J. Infect. Dis.* 185:513–520. doi:10.1086/338833.
- 779   Mei, H.E., M.D. Leipold, A.R. Schulz, C. Chester, and H.T. Maecker. 2015. Barcoding of  
780           Live Human Peripheral Blood Mononuclear Cells for Multiplexed Mass Cytometry. *J.*  
781           *Immunol.* 194:2022–2031. doi:10.4049/jimmunol.1402661.

- 782 Moguche, A.O., M. Musvosvi, A. Penn-Nicholson, C.R. Plumlee, H. Mearns, H. Geldenhuys,  
783 E. Smit, D. Abrahams, V. Rozot, O. Dintwe, S.T. Hoff, I. Kromann, M. Ruhwald, P.  
784 Bang, R.P. Larson, S. Shafiani, S. Ma, D.R. Sherman, A. Sette, C.S. Lindestam  
785 Arlehamn, D.M. McKinney, H. Maecker, W.A. Hanekom, M. Hatherill, P. Andersen,  
786 T.J. Scriba, and K.B. Urdahl. 2017. Antigen Availability Shapes T Cell Differentiation  
787 and Function during Tuberculosis. *Cell Host Microbe*. 21:695-706.e5.  
788 doi:10.1016/j.chom.2017.05.012.
- 789 Musvosvi, M., D. Duffy, E. Filander, H. Africa, S. Mabwe, L. Jaxa, N. Bilek, A. Llibre, V.  
790 Rouilly, M. Hatherill, M. Albert, T.J. Scriba, and E. Nemes. 2018. T-cell biomarkers for  
791 diagnosis of tuberculosis: candidate evaluation by a simple whole blood assay for  
792 clinical. *Eur Respir J*. 51. doi:10.1183/13993003.00153-2018.
- 793 Nyendak, M.R., B. Park, M.D. Null, J. Baseke, G. Swarbrick, H. Mayanja-Kizza, M. Nsereko,  
794 D.F. Johnson, P. Gitta, A. Okwera, S. Goldberg, L. Bozeman, J.L. Johnson, W.H. Boom,  
795 D.A. Lewinsohn, and D.M. Lewinsohn. 2013. Mycobacterium tuberculosis specific  
796 CD8+ T cells rapidly decline with antituberculosis treatment. *PLoS One*. 8.  
797 doi:10.1371/journal.pone.0081564.
- 798 Ohnuma, K., N.H. Dang, and C. Morimoto. 2008. Revisiting an old acquaintance: CD26 and  
799 its molecular mechanisms in T cell function. *Trends Immunol*. 29:295–301.  
800 doi:10.1016/j.it.2008.02.010.
- 801 Parrish, N.M., and K.C. Carroll. 2011. Role of the clinical mycobacteriology laboratory in  
802 diagnosis and management of tuberculosis in low-prevalence settings. *J. Clin. Microbiol*.  
803 49:772–776. doi:10.1128/JCM.02451-10.
- 804 Patankar, Y.R., R. Sutiwisesak, S. Boyce, R. Lai, C.S. Lindestam Arlehamn, A. Sette, and  
805 S.M. Behar. 2020. Limited recognition of Mycobacterium tuberculosis-infected  
806 macrophages by polyclonal CD4 and CD8 T cells from the lungs of infected mice.

- 807 *Mucosal Immunol.* 13:140–148. doi:10.1038/s41385-019-0217-6.
- 808 Pereira, D.G., A. Afonso, and F.M. Medeiros. 2015. Overview of Friedmans Test and Post-  
809 hoc Analysis. *Commun. Stat. Simul. Comput.* 44:2636–2653.  
810 doi:10.1080/03610918.2014.931971.
- 811 Petruccioli, E., T. Chiacchio, I. Pepponi, V. Vanini, R. Urso, G. Cuzzi, L. Barcellini, D.M.  
812 Cirillo, F. Palmieri, G. Ippolito, and D. Goletti. 2016. First characterization of the CD4  
813 and CD8 T-cell responses to QuantiFERON-TB Plus. *J. Infect.* 73:588–597.  
814 doi:10.1016/j.jinf.2016.09.008.
- 815 Petruccioli, E., L. Petrone, V. Vanini, A. Sampaolesi, G. Gualano, E. Girardi, F. Palmieri, and  
816 D. Goletti. 2013. IFN $\gamma$ /TNF $\alpha$  specific-cells and effector memory phenotype associate  
817 with active tuberculosis. *J. Infect.* 66:475–486. doi:10.1016/j.jinf.2013.02.004.
- 818 Qiagen. 2017. QuantiFERON®-TB Gold Plus (QFT®-Plus) Package Insert. 96:1101062.  
819 doi:10.1016/j.athoracsur.2015.08.092.
- 820 Quintelier, K., A. Couckuyt, A. Emmaneel, J. Aerts, Y. Saeys, and S. Van Gassen. 2021.  
821 Analyzing high-dimensional cytometry data using FlowSOM. *Nat. Protoc.*  
822 doi:10.1038/s41596-021-00550-0.
- 823 Rahman, A.H., L. Tordesillas, and M.C. Berin. 2016. Heparin Reduces Nonspecific  
824 Eosinophil Staining Artifacts in Mass Cytometry Experiments. *Cytometry.* 89A:601–  
825 607. doi:10.1002/cyto.a.22826.
- 826 Riou, C., N. Berkowitz, R. Goliath, W.A. Burgers, and R.J. Wilkinson. 2017. Analysis of the  
827 phenotype of Mycobacterium tuberculosis-specific CD4+ T cells to discriminate latent  
828 from active tuberculosis in HIV-Uninfected and HIV-Infected individuals. *Front.*  
829 *Immunol.* 8. doi:10.3389/fimmu.2017.00968.
- 830 Riou, C., E. Du Bruyn, S. Ruzive, R.T. Goliath, C.S. Lindestam Arlehamn, A. Sette, A. Sher,  
831 D.L. Barber, and R.J. Wilkinson. 2020. Disease extent and anti-tubercular treatment

832 response correlates with *Mycobacterium tuberculosis*-specific CD4 T-cell phenotype  
833 regardless of HIV-1 status. *Clin. Transl. Immunol.* 9:e1176. doi:10.1002/cti2.1176.

834 Riou, C., C.M. Gray, M. Lugongolo, T. Gwala, A. Kiravu, P. Deniso, L. Stewart-Isherwood,  
835 S.V. Omar, M.P. Grobusch, G. Coetzee, F. Conradie, N. Ismail, G. Kaplan, and D.  
836 Fallows. 2014. A subset of circulating blood mycobacteria-specific CD4 T cells can  
837 predict the time to *Mycobacterium tuberculosis* sputum culture conversion. *PLoS One.* 9.  
838 doi:10.1371/journal.pone.0102178.

839 Roy Chowdhury, R., F. Vallania, Q. Yang, C.J. Lopez Angel, F. Darboe, A. Penn-Nicholson,  
840 V. Rozot, E. Nemes, S.T. Malherbe, K. Ronacher, G. Walzl, W. Hanekom, M.M. Davis,  
841 J. Winter, X. Chen, T.J. Scriba, P. Khatri, and Y. Chien. 2018. A multi-cohort study of  
842 the immune factors associated with *M. tuberculosis* infection outcomes. *Nature.*  
843 doi:10.1038/s41586-018-0439-x.

844 Rozot, V., S. Vigano, J. Mazza-stalder, E. Idrizi, C.L. Day, M. Perreau, C. Lazor-blanchet, E.  
845 Petruccioli, W. Hanekom, P. Bart, L. Nicod, G. Pantaleo, and A. Harari. 2013.  
846 *Mycobacterium tuberculosis*-specific CD8+ T cells are functionally and phenotypically  
847 different between latent infection and active disease. *Eur. J. Immunol.* 43:1568–1577.  
848 doi:10.1002/eji.201243262.*Mycobacterium*.

849 Rubin, S.J.S., L. Bai, Y. Haileselassie, G. Garay, C. Yun, L. Becker, S.E. Streett, S.R. Sinha,  
850 and A. Habtezion. 2019. Mass cytometry reveals systemic and local immune signatures  
851 that distinguish inflammatory bowel diseases. *Nat. Commun.* 10. doi:10.1038/s41467-  
852 019-10387-7.

853 Sali, M., D. Buonsenso, P. D’Alfonso, F. De Maio, M. Ceccarelli, B. Battah, I. Palucci, T.  
854 Chiacchio, D. Goletti, M. Sanguinetti, P. Valentini, and G. Delogu. 2018. Combined use  
855 of Quantiferon and HBHA-based IGRA supports tuberculosis diagnosis and therapy  
856 management in children. *J. Infect.* doi:10.1016/j.jinf.2018.09.011.

- 857 Serbina, N. V., C.-C. Liu, C.A. Scanga, and J.L. Flynn. 2000. CD8+ CTL from Lungs of  
858 Mycobacterium tuberculosis -Infected Mice Express Perforin In Vivo and Lyse Infected  
859 Macrophages. *J. Immunol.* 165:353–363. doi:10.4049/jimmunol.165.1.353.
- 860 Singhanian, A., R. Verma, C.M. Graham, J. Lee, T. Tran, M. Richardson, P. Lecine, P.  
861 Leissner, M.P.R. Berry, R.J. Wilkinson, K. Kaiser, M. Rodrigue, G. Woltmann, P.  
862 Haldar, and A. O’Garra. 2018. A modular transcriptional signature identifies phenotypic  
863 heterogeneity of human tuberculosis infection. *Nat. Commun.* 9. doi:10.1038/s41467-  
864 018-04579-w.
- 865 Vickers, M.A., F. Darboe, C.N. Muefong, G. Mbayo, A. Barry, A. Gindeh, S. Njie, A.J.  
866 Riley, B. Sarr, B. Sambou, H.M. Dockrell, S. Charalambous, A. Rachow, O. Owolabi, S.  
867 Jayasooriya, and J.S. Sutherland. 2020. Monitoring Anti-tuberculosis Treatment  
868 Response Using Analysis of Whole Blood Mycobacterium tuberculosis Specific T Cell  
869 Activation and Functional Markers. *Front. Immunol.* 11:1–13.  
870 doi:10.3389/fimmu.2020.572620.
- 871 Wang, X., Z. Cao, J. Jiang, H. Niu, M. Dong, A. Tong, and X. Cheng. 2010. Association of  
872 mycobacterial antigen-specific CD4+ memory T cell subsets with outcome of pulmonary  
873 tuberculosis. *J. Infect.* 60:133–139. doi:10.1016/j.jinf.2009.10.048.
- 874 World Health Organization Geneva. 2018. Global Tuberculosis Report 2018.
- 875 World Health Organization Geneva. 2019. WHO consolidated guidelines on drug-resistant  
876 tuberculosis treatment.
- 877 World Health Organization Geneva. 2020. Global Tuberculosis Report 2020. 1. 1–8 pp.
- 878 Yoav Benjamini, and Yosef Hochberg. 1995. Controlling the False Discovery Rate: A  
879 Practical and Powerful Approach to Multiple Testing. *J. R. Stat. Soc. Ser. B.* 57:289–300.  
880



## 882 Figures

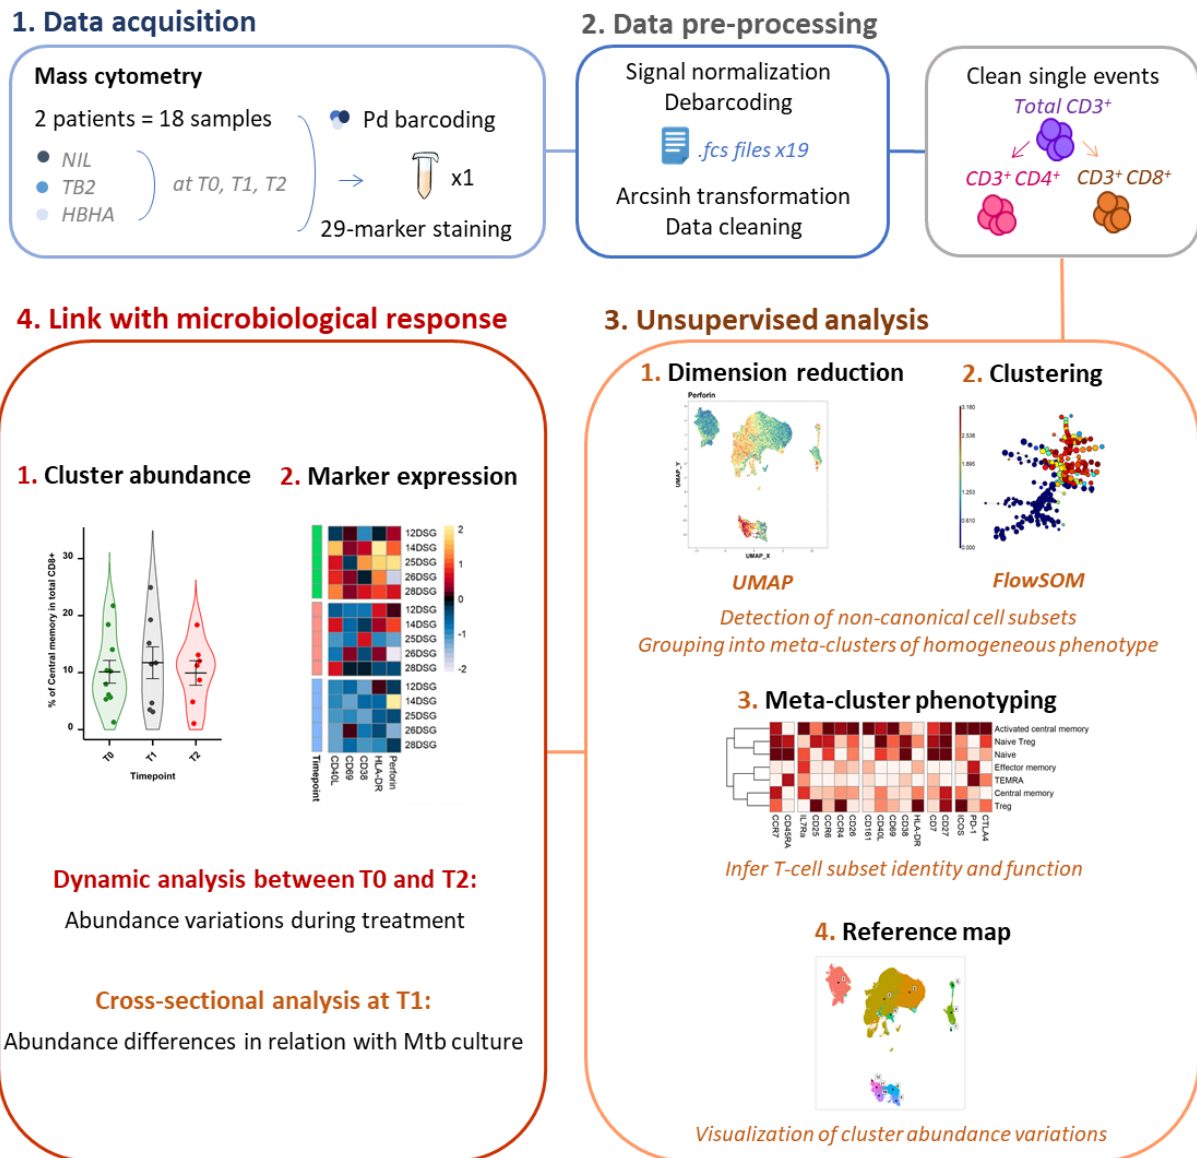

883

### 884 Figure 1. Experimental and analytical workflow.

885 Peripheral whole blood samples were collected from active TB patients (n = 22) throughout  
 886 treatment (T0: baseline. T1: T0 + 2 months. T2: end of treatment). After whole blood  
 887 stimulation with *Mtb* antigens (TB2 and rmsHBHA) or with a negative control (NIL), total  
 888 white blood cells were extracted. After palladium (Pd) barcoding for unique sample  
 889 identification before multiplexing, T-cells were analyzed with a 29-marker mass cytometry  
 890 panel. Abbreviations: TB2: Qiagen QuantiFERON TB2 tube (ESAT-6 + CFP-10 + undisclosed



891 CD8<sup>+</sup> T-cell stimulating peptide pool). rmsHBHA: recombinant heparin-binding hemagglutinin  
892 obtained in *Mycobacterium smegmatis*. UMAP: Uniform Manifold Approximation and  
893 Projection. FlowSOM: self-organizing map.

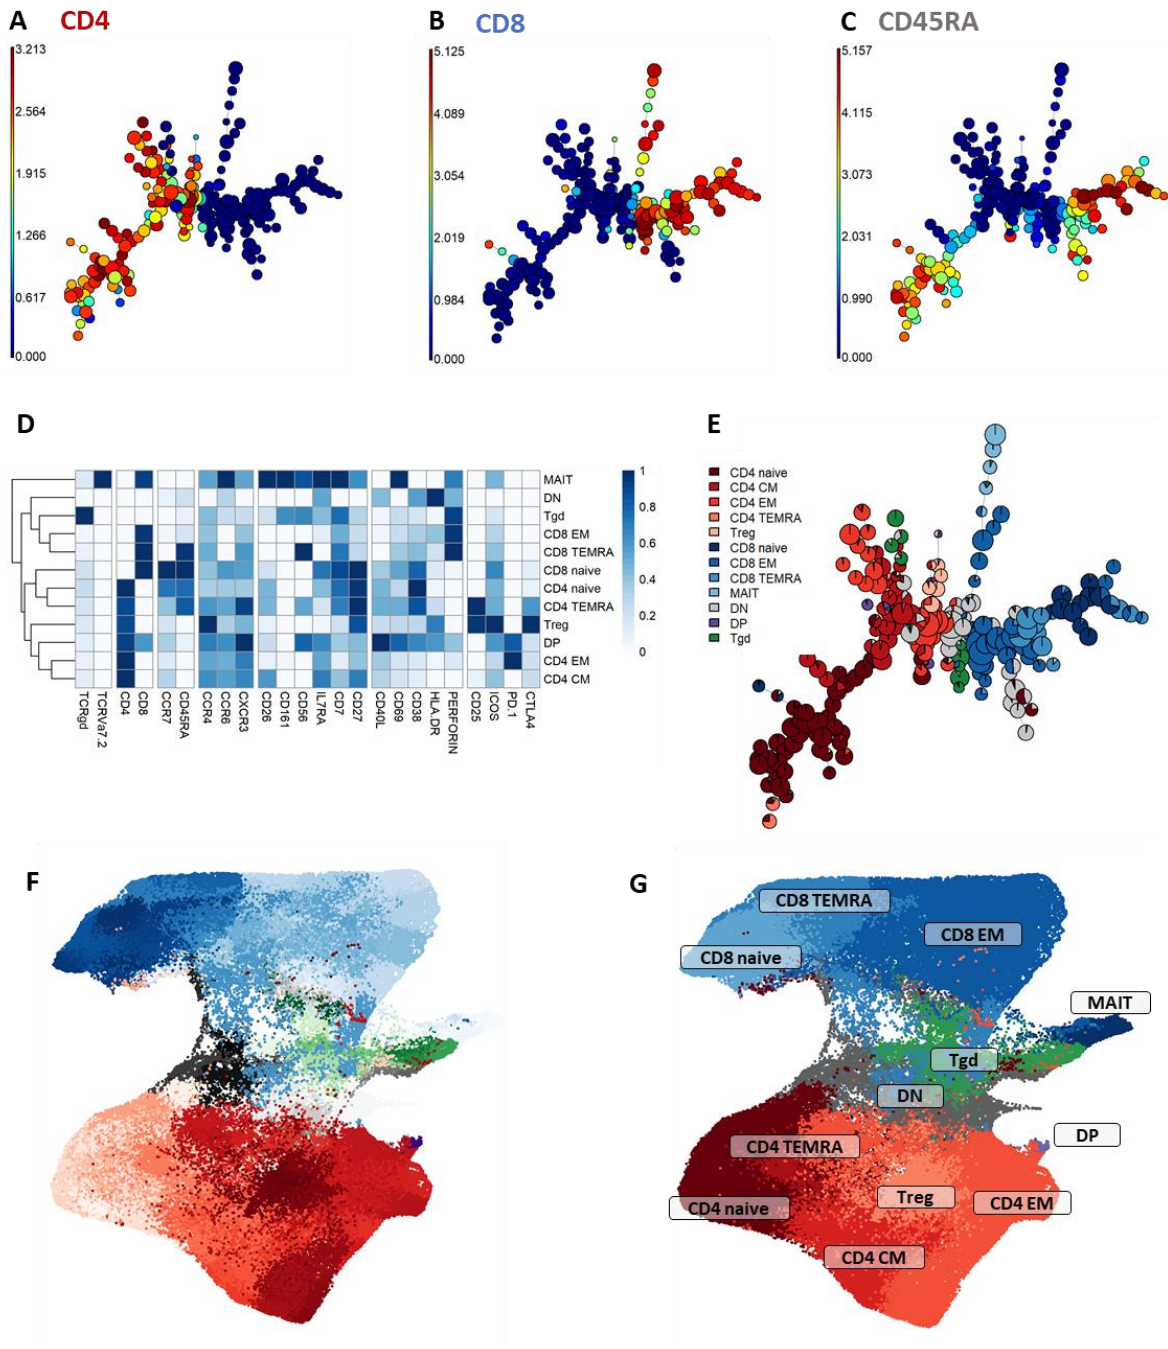

894

895 **Figure 2. Peripheral CD3<sup>+</sup> T-cell unsupervised clustering and phenotyping.**

896 **A to E. FlowSOM automated clustering.** The surface expression of lineage markers used for  
 897 FlowSOM calculations was visualized in all CD3<sup>+</sup> events (201,000 events from equally down-  
 898 sampled files) regardless of timepoint or stimulation. FlowSOM enabled automated repartition  
 899 of CD3<sup>+</sup> events into 196 clusters according to the surface expression of selected lineage markers  
 900 such as CD4 (**A**), CD8 (**B**), and CD45RA (**C**). Scales indicate arcsinh-transformed mass signal

901 values. Clusters were automatically grouped into 18 meta-clusters of homogeneous phenotype,  
902 which were assembled into 12 canonical T-cell subpopulations in a supervised manner after  
903 meta-cluster phenotyping. This was performed with heatmap visualization of normalized,  
904 arcsinh-transformed median mass signal values for each surface marker (**D**). The proportions  
905 of the resulting T-cell subpopulations were visualized on the initial FlowSOM minimum  
906 spanning tree to control phenotyping consistency (**E**).

907 **F and G. Reference mapping.** Dimension reduction was performed with UMAP and overlaid  
908 with automatically determined FlowSOM clusters (**F**) and meta-clusters (**G**) to generate a  
909 phenotype reference map. Cluster labels were not displayed for legibility. Abbreviations: CM:  
910 central memory. DN: double-negative CD4<sup>-</sup>CD8<sup>-</sup>. DN: double-positive CD4<sup>+</sup> CD8<sup>+</sup>. EM:  
911 effector memory. MAIT: mucosal associated invariant T-cells. Tgd: gamma delta T-cells. Treg:  
912 T-regulators. TEMRA: terminally differentiated effectors re-expressing CD45RA.

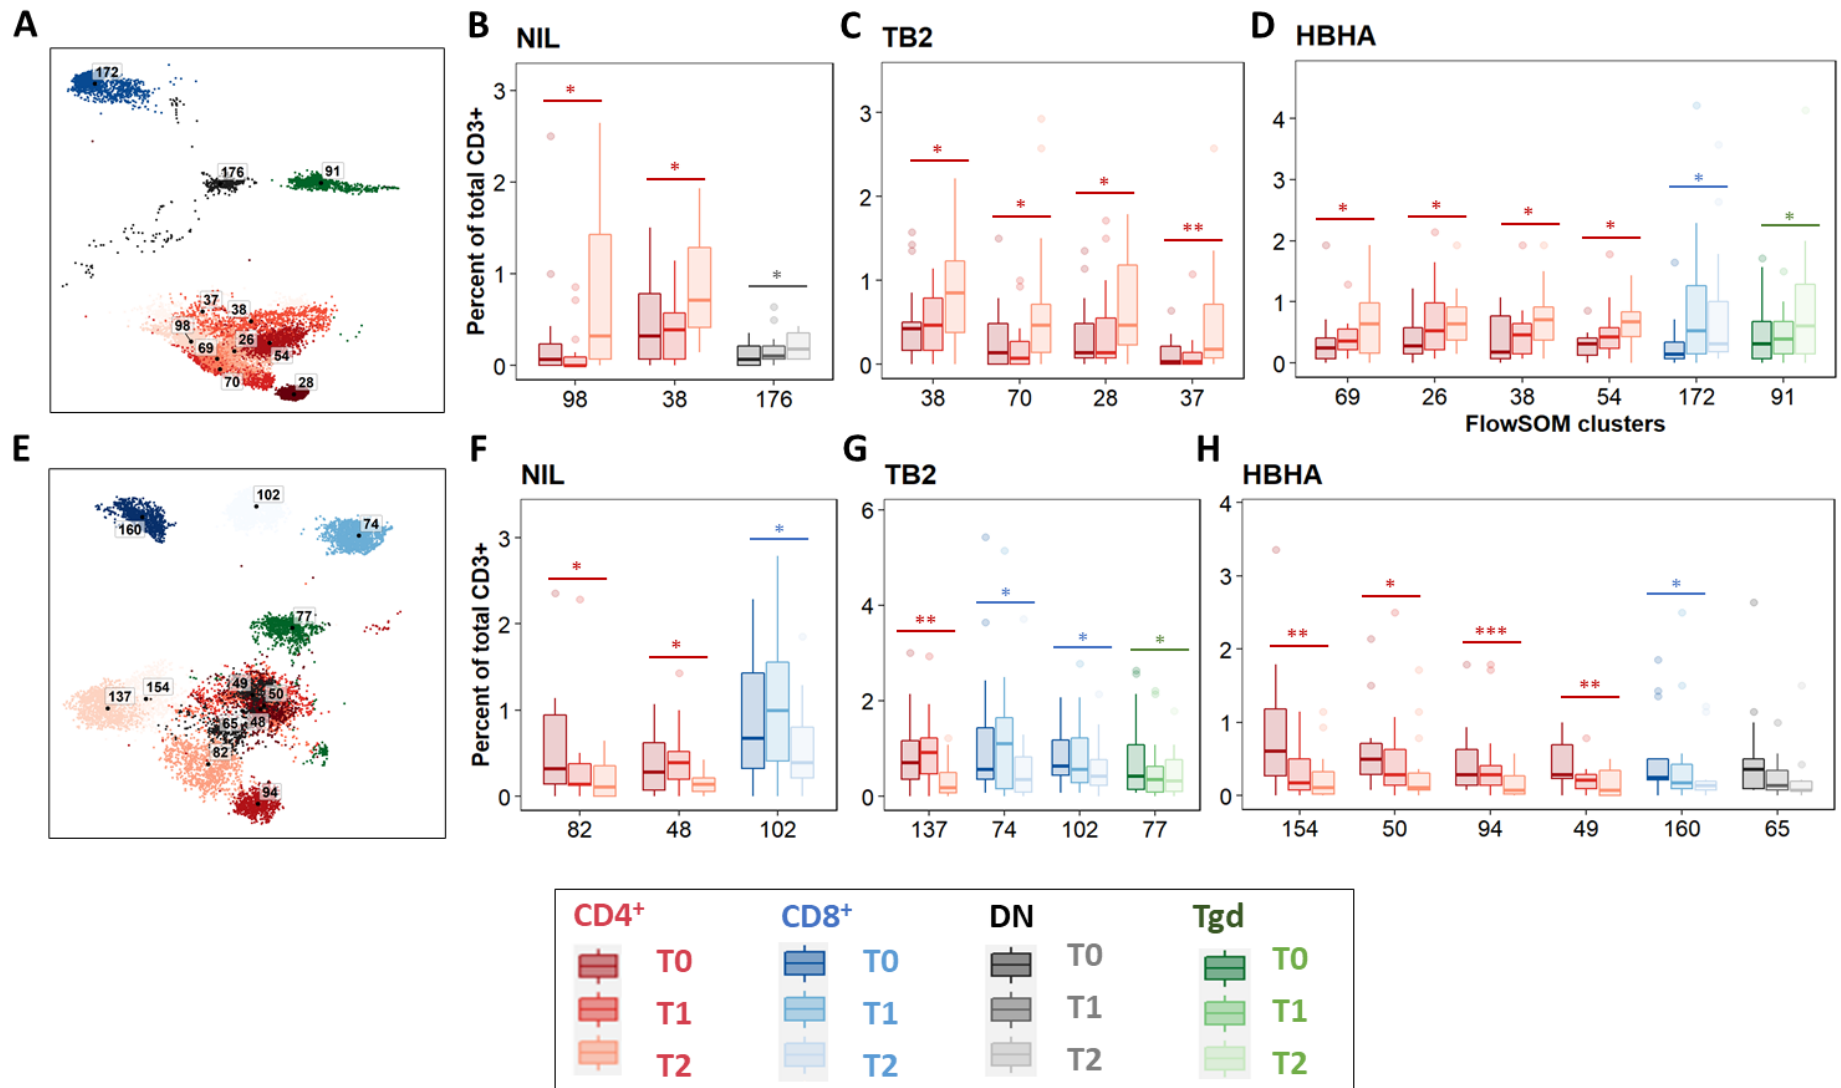

913

914 **Figure 3. Significant abundance changes in non-canonical T-cell subsets throughout TB treatment.**

915 FlowSOM cluster abundance was analyzed over time in unstimulated or *Mtb*-stimulated samples (TB2 or rmsHBHA). Only clusters within which  
916 significant abundance changes were detected were displayed. Number of matched data points per timepoint for all panels: NIL: n = 16. TB2:  
917 n = 18. rmsHBHA: n = 14. Data are represented as medians + interquartile range.

918 **A to D. Significantly increased clusters at treatment completion (T2) compared to treatment initiation (T0).** Clusters within which a  
919 significant increase was detected between T0 and T2 were visualized on the reference UMAP shown in Figure 3 (A). Cluster abundance  
920 quantification was performed in unstimulated (B), TB2-stimulated (C) or rmsHBHA-stimulated samples (D).

921 **E to H. Significantly decreased clusters at treatment completion (T2) compared to treatment initiation (T0).** Mapping (E) and abundance  
922 quantification of clusters which increased between T0 and T2 in unstimulated (F), TB2-stimulated (G) or rmsHBHA-stimulated samples (H).

923 Abbreviations: DN: double negative CD4<sup>-</sup> CD8<sup>-</sup>. Tgd: gamma delta T-cells. Statistical analysis: Friedman rank sum test and Wilcoxon-Nemenyi-

924 Thompson post-hoc for pairwise comparisons between non-independent observations at T0, T1, and T2. \*: p<0.05. \*\*: p<0.01. \*\*\*: p<0.001.

925 Exact p-values and test statistics are available in Supp. Table 3.

926

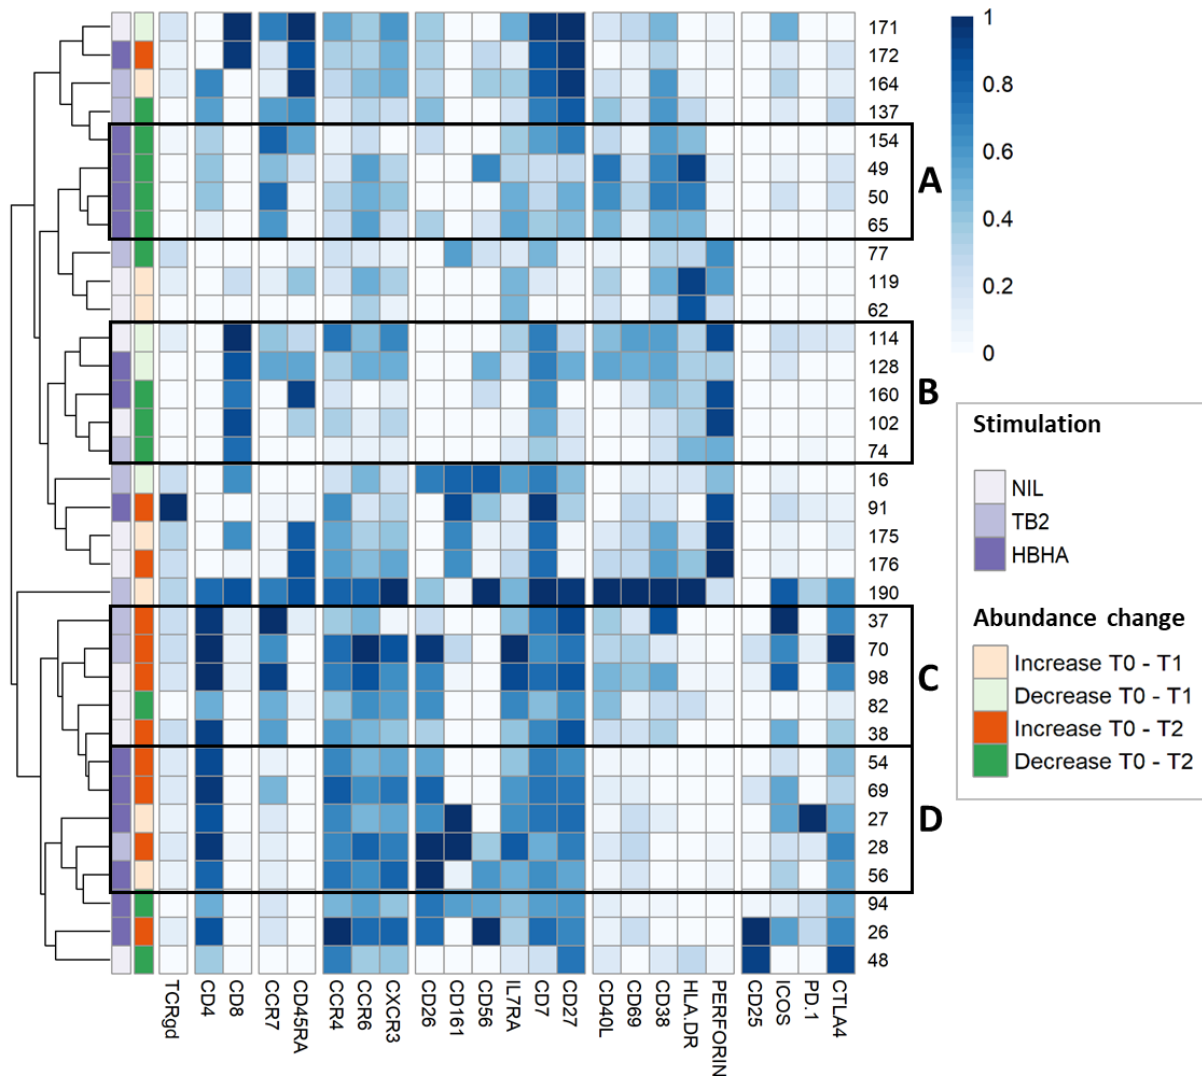

927

928 **Figure 4. In-depth phenotyping shows differential involvement of effector and memory T-**  
 929 **cells in antigen-driven cluster abundance changes during TB treatment.**

930 Mean marker expression levels were visualized using heatmapping for cell cluster which  
 931 increased (orange color code) or decreased (green color code) throughout treatment. Each line  
 932 represents one cell cluster. Scales indicate normalized mass signal intensity. Hierarchical  
 933 clustering was performed based on marker expression levels, regrouping cell clusters of similar  
 934 immunophenotypes. Black rectangles annotated from A to D indicate cell cluster subgroups  
 935 with both similar immunophenotypes and abundance changes.

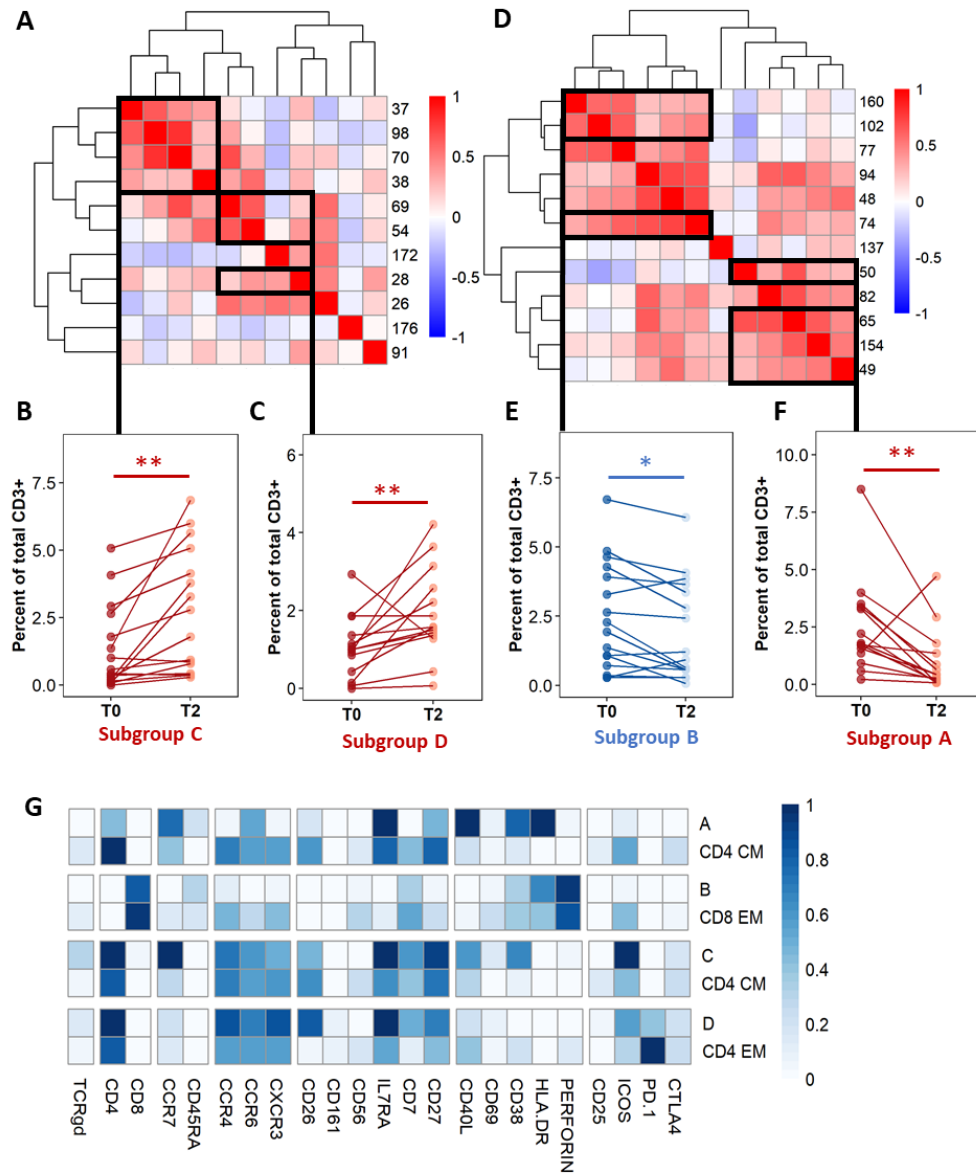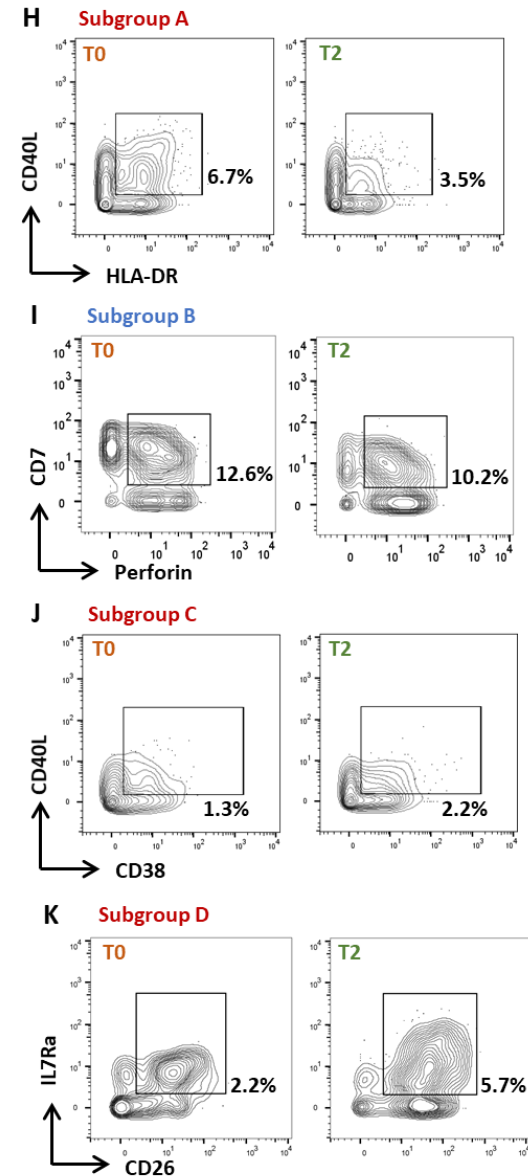

937 **Figure 5. Individual immunoprofiling confirms differential abundance of correlated subsets in cured patients after treatment.**

938 Cluster were stratified by type of significant abundance change: enrichment (**A to C**) or depletion (**D to F**) after treatment completion.

939 **A and D.** Pearson's correlations were calculated on cluster abundance at T0 and displayed on a heatmap with hierarchical clustering. Clusters with  
940 similar immunophenotypes (Figures 3 and 4) and positive correlation coefficients were grouped. Estimates of effect sizes are in Supp. Tables 4  
941 and 5.

942 **B, C, E, F.** The abundance of each subgroup was visualized. Each dot represents data for one patient. Statistical analysis: Friedman rank sum test.

943 \*:  $p < 0.05$ . \*\*:  $p < 0.01$ . Subgroup A: data from rmsHBHA samples ( $n = 14$ ), clusters 49, 50, 65, 154;  $p = 0.0013$ , Friedman's Chi-Square ( $F_{chisq}$ ) =  
944 10.3. Subgroup B: data from unstimulated samples ( $n = 16$ ), clusters 74, 102, 160;  $p = 0.020$ ,  $F_{chisq} = 5.4$ . Subgroup C: data from unstimulated  
945 samples, clusters 37, 38, 70, 98;  $p = 0.0027$ ,  $F_{chisq} = 9$ . Subgroup D: data from rmsHBHA samples, clusters 28, 54, 69;  $p = 0.0023$ ,  $F_{chisq} = 9.3$ .

946 **F.** For each subgroup, normalized mean marker expression levels were compared with similar T-cell subsets.

947 **G to K.** Manual gating analysis was performed to verify unsupervised results (representative plots, 500 to 1,000 events). Numbers indicate the  
948 percentage of gated cells among total  $CD3^+$  cells. Subgroup A:  $CD4^+CCR7^+CD45RA^-CCR6^+IL7Ra^+CD27^+CD40L^+CD38^+HLA-DR^+$ . Subgroup

949 B:  $CD8^+CCR7^-CD45RA^-CD7^+$  Perforin $^+$ . Subgroup C:  $CD4^+CCR7^-CD45RA^-CCR4^+CCR6^+CXCR3^+CD26^+IL7Ra^+CD7^+CD27^+CD40L^+CD38^+$ .

950 Subgroup D:  $CD4^+CCR7^-CD45RA^-CCR4^+CCR6^+CXCR3^+CD26^+IL7Ra^+CD7^-CD27^+CD40L^+CD38^+HLA-DR^-$ .

951



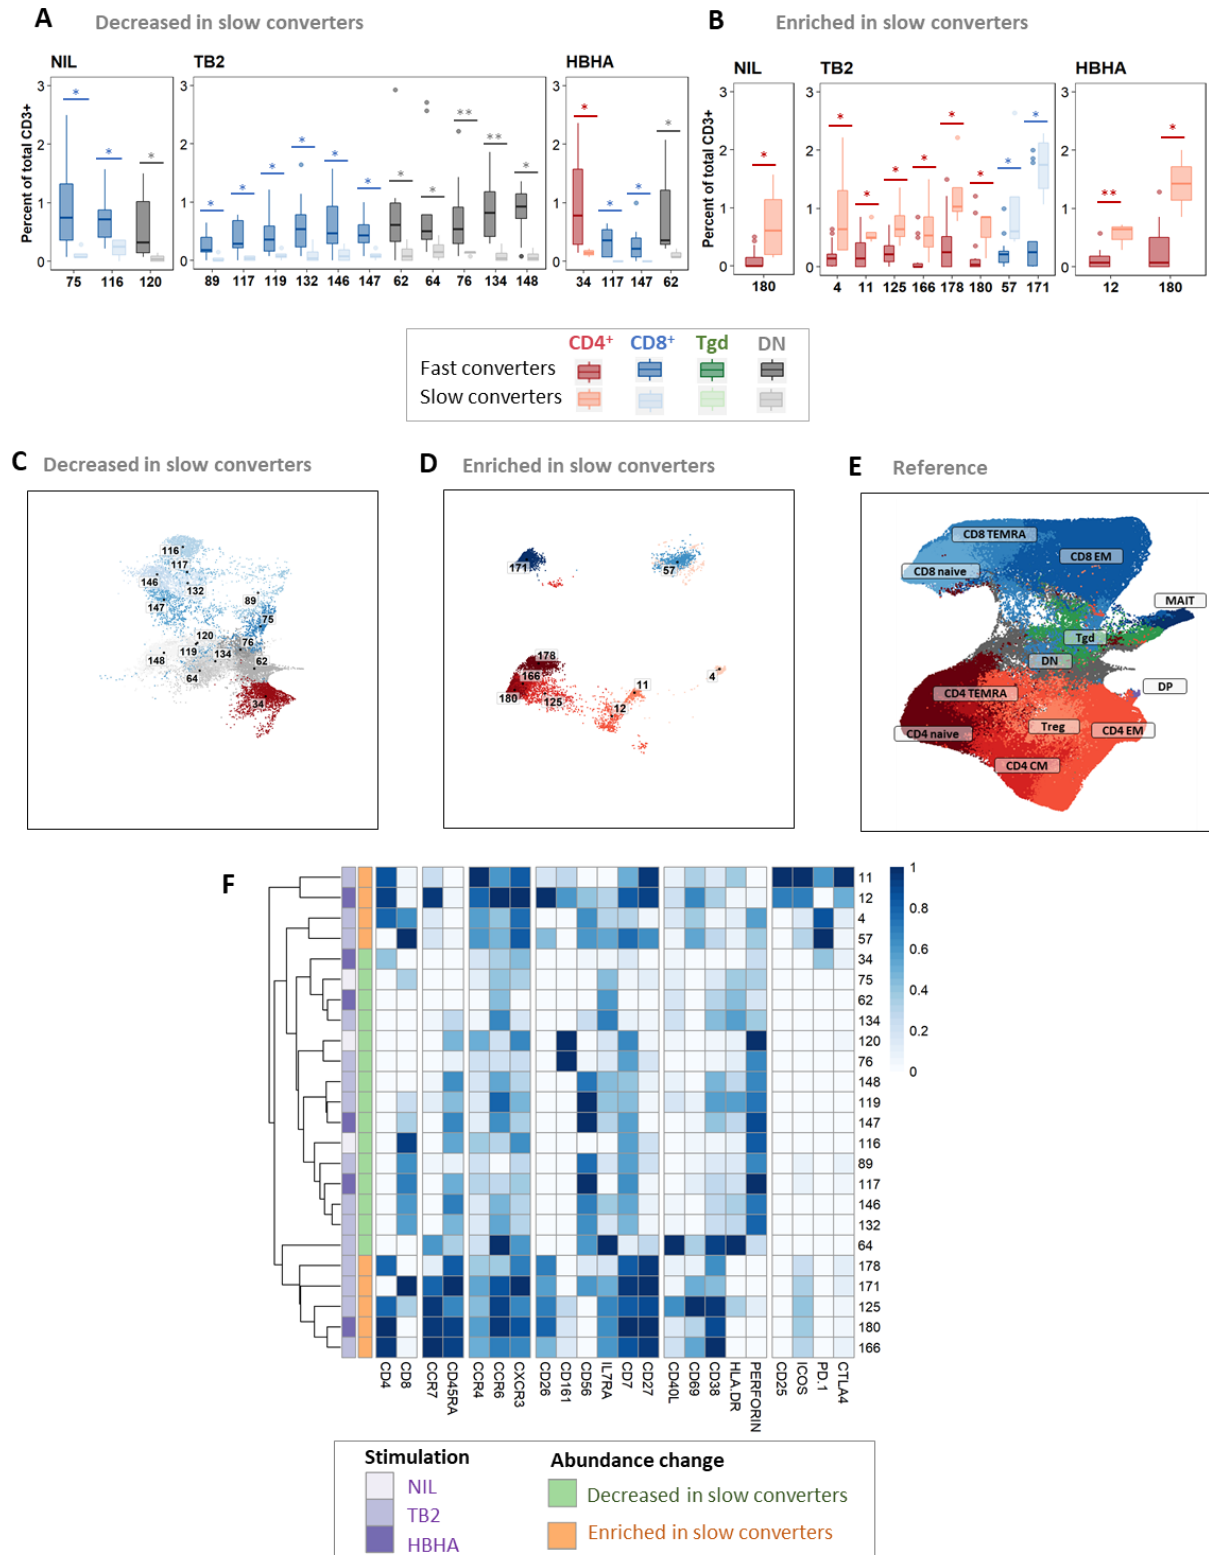

952

953 **Figure 6. Patients with slow microbiological culture conversion show decreased cytotoxic**

954 **CD8<sup>+</sup> and  $\gamma\delta$  enriched CD4<sup>+</sup> naïve T-cell subsets before treatment initiation and after two**

955 **months of treatment compared to fast converters.**

956 Fast converters (n = 18) were defined as patients with permanently negative *M. tuberculosis*  
957 culture after two months of treatment (T1), whereas slow converters (n = 4) were defined as  
958 patients with persistently positive cultures at T1. The abundance of all FlowSOM clusters at  
959 baseline was compared between fast and slow converters. CD4<sup>+</sup> clusters were represented in  
960 red, CD8<sup>+</sup> clusters in blue, and  $\gamma\delta$  T-cell clusters in green. Clusters which were significantly  
961 decreased (**A** and **C**) or enriched (**B** and **D**) at T1 in slow converters compared to fast converters  
962 were compared to the reference UMAP (**E**). Normalized, arcsinh-transformed mean marker  
963 expression levels were visualized (**F**). Each row represents one cluster. Scales indicate  
964 normalized mass signal intensity. Boxplot data represent medians + interquartile range.

965 Statistical analysis: Only clusters within which significant differences were detected were  
966 represented. Significance threshold: p<0.035 (Mann-Whitney U test). \*: p<0.031. \*\*: p<0.001.

967 Exact p-values and test statistics are available in Supp. Table 6.

968

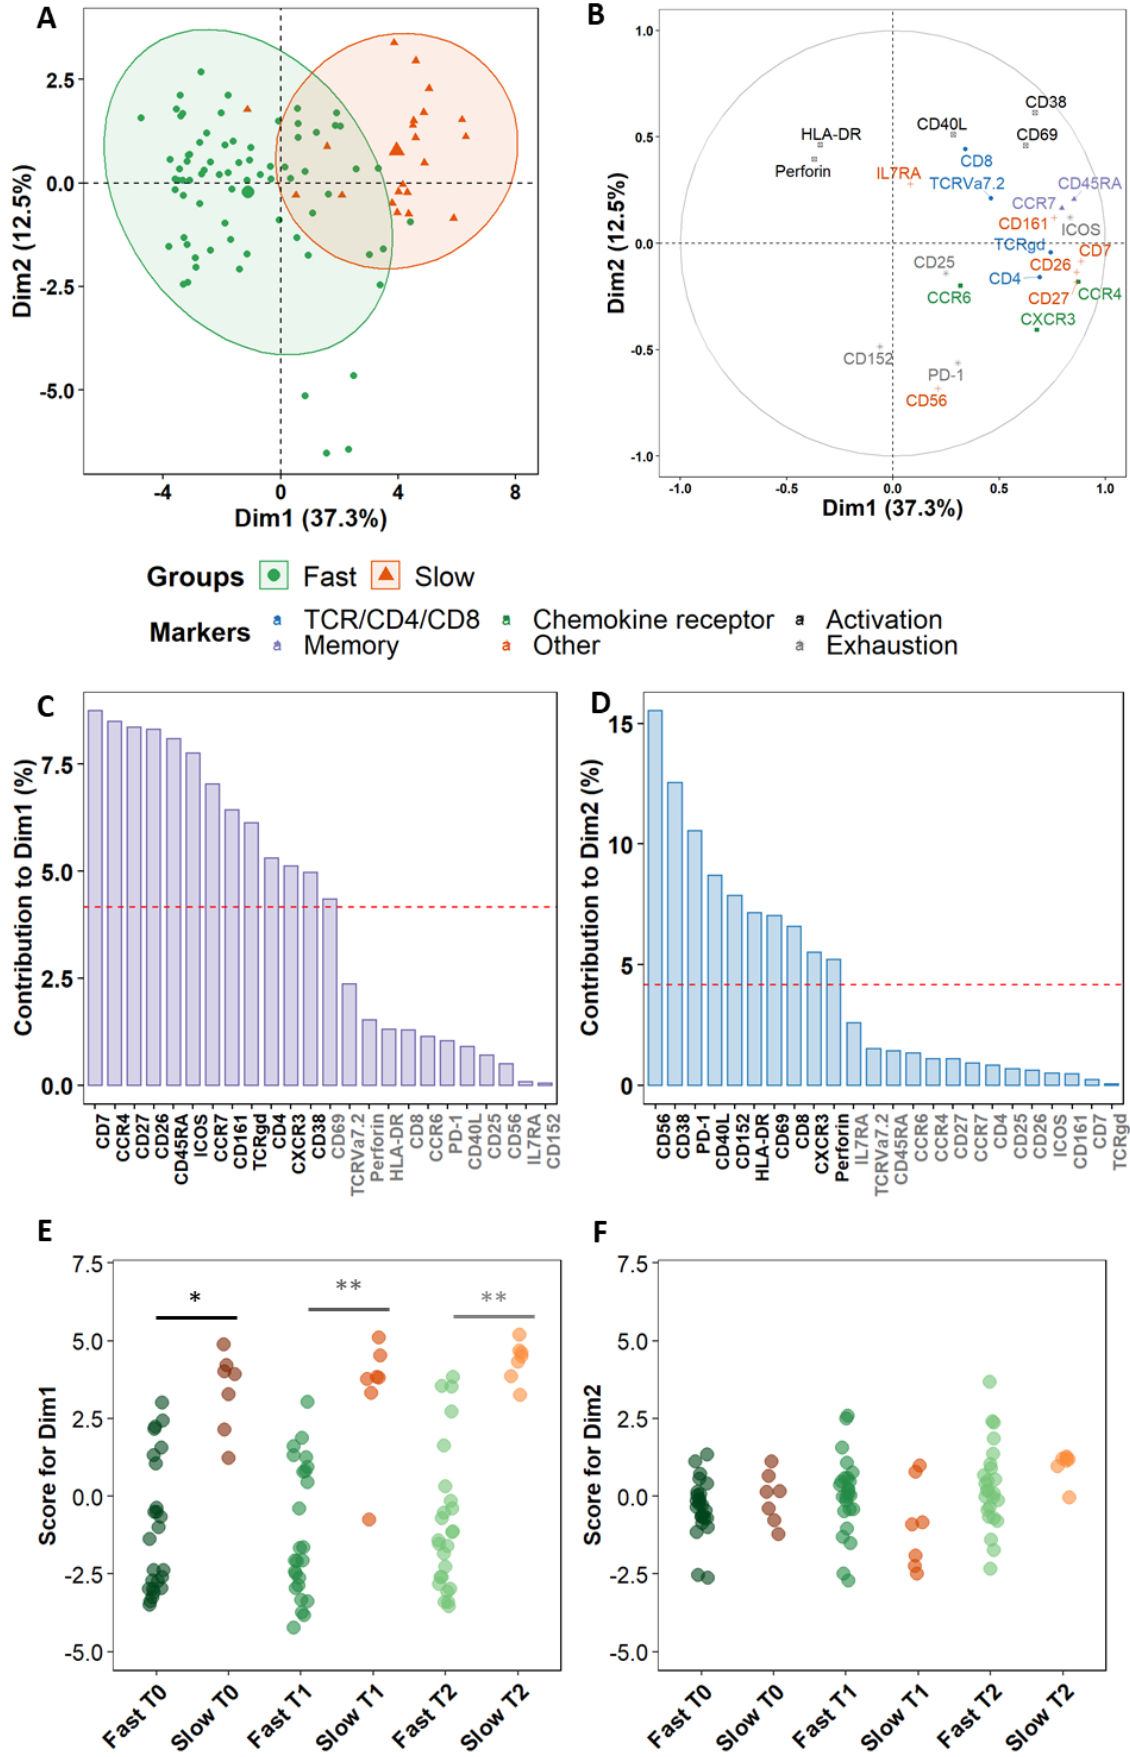

970 **Figure 7. Non-lineage markers discriminate slow and fast responders within differentially**  
971 **abundant subsets.**

972 Principal Component Analysis (PCA) was performed on marker expression data from the  
973 clusters identified in Figure 6, within 96 *Mtb*-stimulated samples matched at T0, T1, and T2  
974 (TB2: 54 samples; rmsHBHA: 42 samples; see Supp. Table 1 for sample number details).

975 **A.** Explanation of the variance between fast converters (25 samples at each timepoint) and slow  
976 converters (7 samples at each timepoint). Axes represent the principal components 1  
977 (Dimension 1, Dim1) and 2 (Dim2). Percentages indicate their contribution to the total observed  
978 variance. Axis values represent individual PCA scores. Concentration ellipses correspond to  
979 90% data coverage.

980 **B.** Contribution of cellular markers to the variance described by Dim1 and Dim2. Axis values  
981 represent marker PCA scores. Color codes represent broad marker functions.

982 **C and D.** Quantification of panel B for Dim1 (**C**) and Dim2 (**D**). Contributions of each marker  
983 are expressed as a percentage of the dimensions. The dashed line corresponds to the expected  
984 reference value if each marker contributed uniformly to the variance. Markers indicated in gray  
985 are below this reference value.

986 **E and F.** Distribution of individual PCA score values according to the culture conversion group  
987 at each timepoint, for Dim1 (**E**) and Dim2 (**F**). Wilcoxon Rank Sum Test. \*\*\*:  $p < 0.001$ . \*\*:  
988  $p < 0.001$ . Exact p-values and test statistics are in Supp. Table 7.

989

990 **Tables**

991 **Table 1. Selected subset abundance changes before and after treatment completion.**

| <b>Sample</b>             | <b>Abundance between T0 and T2 (% , N)</b> |
|---------------------------|--------------------------------------------|
| <b>Subset A decreased</b> |                                            |
| NIL (n=16)                | 62% (10)                                   |
| TB2 (n=18)                | 67% (12)                                   |
| rmsHBHA (n=14)            | <b>93% (13)</b>                            |
| <b>Subset B decreased</b> |                                            |
| NIL                       | <b>81% (13)</b>                            |
| TB2                       | 72% (13)                                   |
| rmsHBHA                   | 71% (10)                                   |
| <b>Subset C increased</b> |                                            |
| NIL                       | <b>88% (14)</b>                            |
| TB2                       | 72% (13)                                   |
| rmsHBHA                   | 57% (8)                                    |
| <b>Subset D increased</b> |                                            |
| NIL                       | 69% (11)                                   |
| TB2                       | 78% (14)                                   |
| rmsHBHA                   | <b>93% (13)</b>                            |

992 Footnotes: these data were obtained from Figure 5.

993

994

995 **Table 2. Proportions of the main T-cell subpopulations within enriched or decreased**  
 996 **subsets in slow converters compared to fast converters.**

|                                                            | <b>T0 (21 clusters)</b> |                 | <b>T1 (24 clusters)</b> |                 | <b>T2 (21 clusters)</b> |                 |
|------------------------------------------------------------|-------------------------|-----------------|-------------------------|-----------------|-------------------------|-----------------|
| <b>Abundance in slow vs. fast converters</b>               | <b>Decreased</b>        | <b>Enriched</b> | <b>Decreased</b>        | <b>Enriched</b> | <b>Decreased</b>        | <b>Enriched</b> |
|                                                            | <b>86% (18)</b>         | <b>14% (3)</b>  | <b>62% (15)</b>         | <b>38% (9)</b>  | <b>52% (11)</b>         | <b>48% (10)</b> |
| <b>Total CD8<sup>+</sup> and <math>\gamma\delta</math></b> | <b>72% (13)</b>         | <b>67% (2)</b>  | <b>53% (8)</b>          | <b>22% (2)</b>  | <b>36% (4)</b>          | <b>20% (2)</b>  |
| $\gamma\delta$ T-cells                                     | 38 (5)                  | -               | -                       | -               | -                       | -               |
| CD8 <sup>+</sup> TEMRA                                     | 24 (3)                  | 50 (1)          | 75 (6)                  | -               | -                       | -               |
| CD8 <sup>+</sup> EM                                        | 38 (5)                  | -               | 25 (2)                  | 50 (1)          | 100 (4)                 | -               |
| CD8 <sup>+</sup> naïve                                     | -                       | 50 (1)          | -                       | 50 (1)          | -                       | 100 (2)         |
| <b>Total CD4<sup>+</sup></b>                               | <b>11% (2)</b>          | <b>33% (1)</b>  | <b>7% (1)</b>           | <b>78% (7)</b>  | <b>36% (4)</b>          | <b>80% (8)</b>  |
| CD4 <sup>+</sup> TEMRA                                     | -                       | -               | -                       | 14 (1)          | -                       | -               |
| CD4 <sup>+</sup> EM                                        | 50 (1)                  | -               | 100 (1)                 | 29 (2)          | 100 (4)                 | -               |
| CD4 <sup>+</sup> CM                                        | 50 (1)                  | -               | -                       | 14 (1)          | -                       | 38 (3)          |
| CD4 <sup>+</sup> naïve                                     | -                       | 100 (1)         | -                       | 43 (3)          | -                       | 62 (5)          |
| <b>Total DN</b>                                            | <b>17% (3)</b>          | <b>0</b>        | <b>40% (6)</b>          | <b>0</b>        | <b>27% (3)</b>          | <b>0</b>        |

997 Footnotes: these data were obtained from Figure 6 and Supp. Figure 6. Data are given as  
 998 percentage of clusters in each category (number of clusters in each category/total number  
 999 of decreased or enriched clusters).
